1 **Latent Transforming Growth Factor  $\beta$  Binding Protein 3 Controls**  
2 **Adipogenesis**

3

4

5 Karan Singh<sup>1</sup>, Nalani Sachan<sup>1</sup>, Taylor Ene<sup>1</sup>, Branka Dabovic<sup>2</sup>, Daniel Rifkin<sup>1,3,\*</sup>

6

7 1. Department of Cell Biology, New York University Grossman School of  
8 Medicine, New York, NY, USA

9 2. Division of Advanced Research Technologies, New York University  
10 Grossman School of Medicine, New York, NY, USA

11 3. Department of Medicine, New York University Grossman School of  
12 Medicine, New York, NY, USA

13

14 \* Corresponding author, [Daniel.Rifkin@nyumc.org](mailto:Daniel.Rifkin@nyumc.org)

15

16

17

18 **Highlights**

19 • Latent TGF $\beta$  binding protein 3 (LTBP3) is required for adipogenesis

20 • LTBP3 mediates TGF $\beta$  levels in adipogenesis

21 • Loss of LTBP3 results in enhanced rather than decreased levels of active TGF $\beta$

22

23

24 **Abstract:**

25 Transforming growth factor-beta (TGF $\beta$ ) is released from cells as part of a trimeric  
26 latent complex consisting of TGF $\beta$ , the TGF $\beta$  propeptides, and either a latent TGF $\beta$   
27 binding protein (LTBP) or glycoprotein-A repetitions predominant (GARP)  
28 protein. LTBP1 and 3 modulate latent TGF $\beta$  function with respect to secretion,  
29 matrix localization, and activation and, therefore, are vital for the proper function  
30 of the cytokine in a number of tissues. TGF $\beta$  modulates stem cell differentiation  
31 into adipocytes (adipogenesis), but the potential role of LTBPs in this process has  
32 not been studied. We observed that 72 h post adipogenesis initiation *Ltbp1*, *2*, and  
33 *4* expression levels decrease by 74-84%, whereas *Ltbp3* expression levels remain  
34 constant during adipogenesis. We found that LTBP3 silencing in C3H/10T1/2 cells  
35 reduced adipogenesis, as measured by the percentage of cells with lipid vesicles  
36 and the expression of the transcription factor peroxisome proliferator-activated  
37 receptor gamma (PPAR $\gamma$ ). Lentiviral mediated expression of an *Ltbp3* mRNA

38 resistant to siRNA targeting rescued the phenotype, validating siRNA specificity.  
39 Knockdown (KD) of *Ltbp3* expression in 3T3-L1, M2, and primary bone marrow  
40 stromal cells (BMSC) indicated a similar requirement for *Ltbp3*. Epididymal and  
41 inguinal white adipose tissue fat pad weights of *Ltbp3*<sup>-/-</sup> mice were reduced by 62%  
42 and 57%, respectively, compared to wild-type mice. Inhibition of adipogenic  
43 differentiation upon LTBP3 loss is mediated by TGFβ, as TGFβ neutralizing  
44 antibody and TGFβ receptor I kinase blockade rescue the LTBP3 KD phenotype.  
45 These results indicate that LTBP3 has a TGFβ-dependent function in adipogenesis  
46 both in vitro and in vivo.

47

48 **Keywords:** Transforming growth factor-beta, latent TGFβ binding protein 3,  
49 adipogenesis, peroxisome proliferator-activated receptor γ, bone marrow  
50 mesenchymal stem cells.

51

52 **Significance:** Understanding the control of mesenchymal stem cell fate is crucial  
53 for the potential use of these cells for regenerative medicine.

54

## 55 **Introduction**

56 The cytokine TGFβ has multiple contextual effects on a variety of cell types during  
57 development and in adulthood. Loss of TGFβ results in abnormal bone formation,  
58 impaired lung development, inflammation, vascular defects, and cancer [1,2,3,4].  
59 TGFβ activity is controlled both at the level of gene expression and receptor  
60 binding, as well as at the level of growth factor accessibility. Unlike most growth  
61 factors or cytokines, mature TGFβ is released from cells as part of an inactive  
62 complex in which the mature TGFβ homodimer remains non-covalently associated  
63 with its cleaved propeptide dimer [5]. Within this small latent complex (SLC),  
64 TGFβ cannot engage with its signaling receptor because the propeptides shield the  
65 receptor binding regions of the ligand. The propeptides are themselves disulfide-  
66 bonded either to one of three LTBP3s, which are secretory proteins, or to GARP or  
67 to a leucine-rich-repeat-containing protein 32 (LRRC32), which are  
68 transmembrane proteins [6,7,8,9]. The trimeric complex of TGFβ, propeptide, and

69 LTBP/GARP forms the large latent complex (LLC). LTBP, GARP and LRRC32  
70 focus the LLC within extracellular space facilitating TGF $\beta$  activation by integrins,  
71 proteases, or shear. Formation of the LLC is necessary for proper TGF $\beta$  function,  
72 as prevention of LLC formation by mutation of the binding cysteine residues in  
73 either the propeptide or the LTBP blocks latent TGF $\beta$  activation [3,10].

74

75 Three different LTBPs (LTBP1, 3, or 4) can bind covalently to the TGF $\beta$   
76 propeptides [11,12,13,14]. LTBP1 and 3 avidly complex with all three isoforms of  
77 TGF $\beta$ , whereas LTBP4 binds only TGF $\beta$ 1 and does so poorly. LTBP2 does not  
78 bind to any SLC isoform [10,13]. The ability of multiple TGF $\beta$  isoforms to bind to  
79 two or three different LTBPs yields a combinatorial complexity associated with the  
80 ability of TGF $\beta$  to perform a plethora of functions, as individual LTBPs may have  
81 specific extracellular sites of deposition, unique expression patterns, or differential  
82 availability to activators of the latent complex.

83

84 One process in which LTBPs might have an important role is in the orchestration  
85 of stem cell differentiation. The local environment (niche) is important in directing  
86 stem cell differentiation, yet the identification of the extracellular components of  
87 the niche that participate in stem cell maintenance and developmental choice have  
88 not been well described. Within the mesenchymal stem cell niche, TGF $\beta$  acts as a  
89 suppressor of both adipo- and osteogenesis [15,16,17]. However, the activation of  
90 latent TGF $\beta$  and specifically the role of LTBPs in modulating TGF $\beta$  availability in  
91 this process within the niche have not been addressed. To interrogate the function  
92 of the LTBPs and, by inference TGF $\beta$ , in adipogenesis, we examined the LTBP  
93 requirements for cultured multipotent mesenchymal cell differentiation to  
94 adipocytes. We found that the elimination of LTBP3 in vitro and in vivo impedes  
95 adipocyte formation in a TGF $\beta$ -dependent manner.

96

97

98 **Results**

99

## 100 **Effects of LTBP3 suppression**

101 We examined LTBP levels during differentiation of mouse C3H/10T1/2 cells  
102 (10T1/2 cells) to gain insight into potential LTBP function in adipogenesis. 10T1/2  
103 cells, when placed in culture medium that promotes adipogenesis, adopt an  
104 adipocyte phenotype that can be monitored by the expression of adipocyte-  
105 associated transcription factors, such as *Ppar $\gamma$*  and CCAAT/enhancer-binding  
106 protein-alpha (*Cebpa*) and by the accumulation of Oil Red O (ORO) positive lipid  
107 vesicles. To characterize the LTBP repertoire of 10T1/2 cells during adipogenesis,  
108 we initially exposed cells to adipocyte differentiation medium and quantified the  
109 transcript levels of the four *Ltbps*. Under non-differentiation conditions 10T1/2  
110 cells express transcripts for all four *Ltp* genes (**Fig. 1A-D**), but by 72 h post  
111 adipogenesis initiation, *Ltp1*, 2, and 4 transcript levels are decreased by 74-84%  
112 and by 120 h by 89-97% (**Fig. 1A, B and D**), whereas *Ltp3* transcript levels  
113 remained virtually unchanged (**Fig. 1C**). Transcript levels of *Ppar $\gamma$*  significantly  
114 increased over the course of the experiment (**Fig. 1E**). The sustained expression of  
115 *Ltp3* suggested a potential continuing role for this TGF $\beta$  carrier in the  
116 differentiation process.

117

118 We probed the role of LTBP3 during 10T1/2 cell differentiation by treating cells  
119 with a siRNA (siLtp3-4) designed to facilitate *Ltp3* mRNA degradation. siLtp3-  
120 4 pre-treatment for 48 h diminished LTBP3 protein levels by over 64% for at least  
121 7 days (**SI Fig. 1C and D**). The long-term (5 days) suppression of LTBP3 protein  
122 levels permitted us to treat cells with siLtp3-4, wait 48 h to eliminate existing  
123 *Ltp3* mRNA, initiate differentiation, and measure levels of adipocyte markers over  
124 the subsequent 3-5-day period. In addition to the decrease in *Ppar $\gamma$*  observed upon  
125 *Ltp3* KD, we also detected a concordant decrease in the expression of the early  
126 transcription factors sterol regulatory element-binding factor-1 (*Srebf1*),  
127 CCAAT/enhancer binding protein-delta (*Cebp $\delta$* ), the adipogenic master  
128 transcription factors *Ppar $\gamma$*  and *Cebpa*, as well as fatty acid synthase (*Fasn*); all of  
129 which are associated with adipogenesis (**Fig. 1G, I-L**). There was only a slight  
130 decrease in the expression level of the early transcription factor *Cebp $\beta$*  (**Fig.1H**). In

131 addition, there was a significant decrease (80%) in cells containing lipid vesicles  
 132 (SI Fig. 1A and B), indicating the acquisition of an adipocyte phenotype. These  
 133 results indicate the participation of LTBP3 in the initiation of the adipogenic state.  
 134

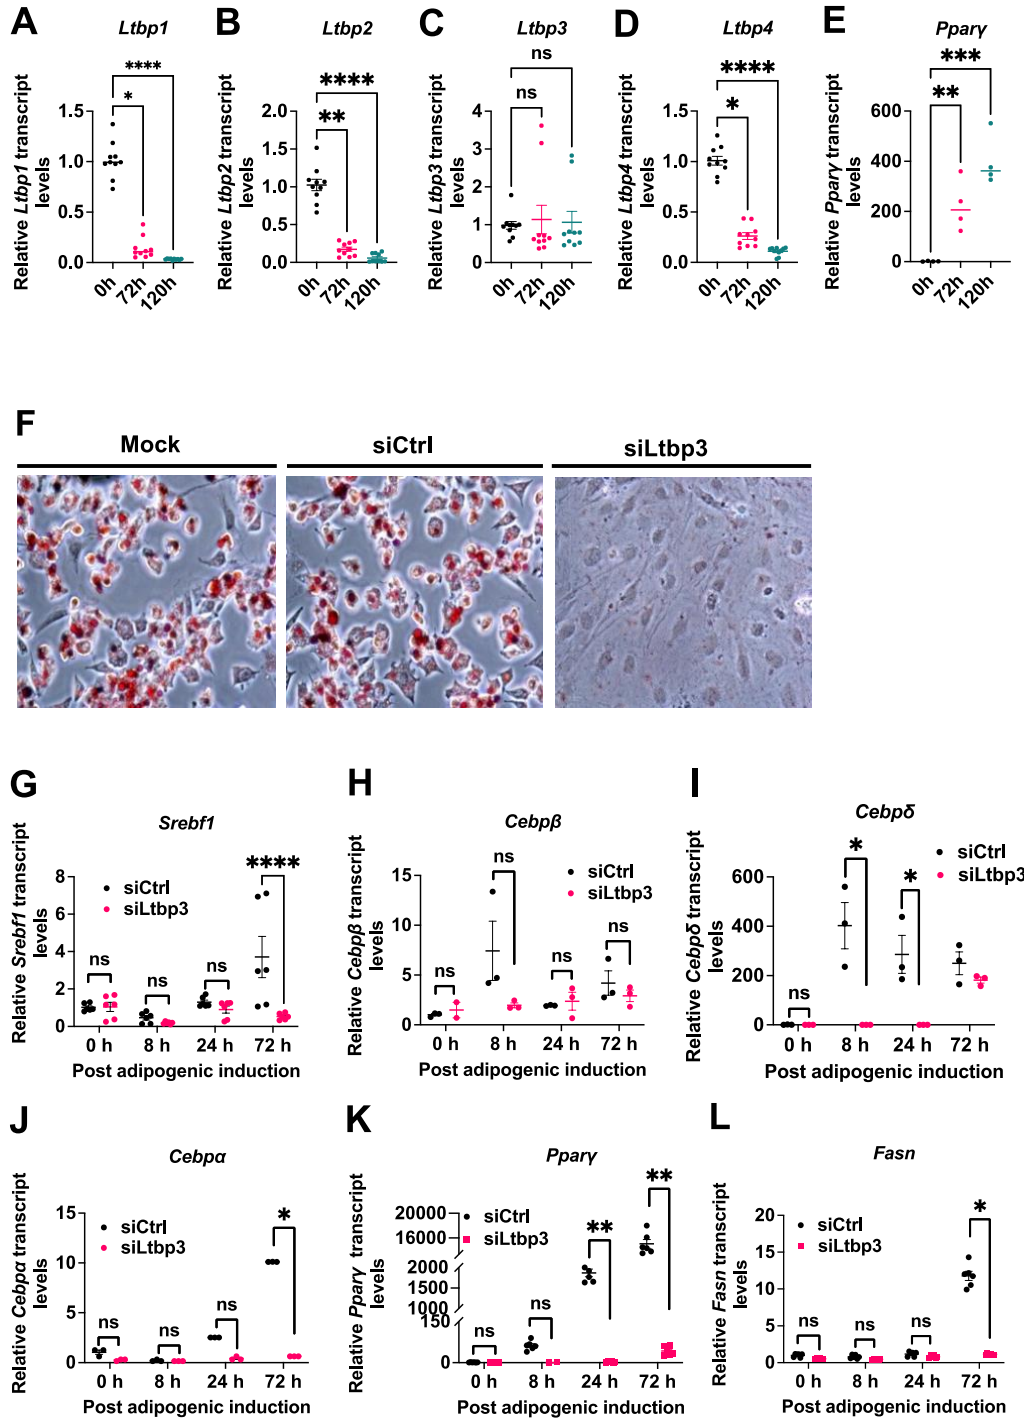

162 **Fig. 1. LTBP3 regulates adipogenesis in vitro.** (A-E) Relative transcript levels of  
163 *Ltbp1*, *Ltbp2*, *Ltbp3*, *Ltbp4*, and *Ppar $\gamma$*  in 10T1/2 cells. Levels of the four different  
164 *Ltbps* and *Ppar $\gamma$*  transcripts in 10T1/2 cells treated with adipogenic media for 0, 24,  
165 72, and 120 h were measured by qRT-PCR as described in Methods. qRT-PCR  
166 values were normalized to beta-2 microglobulin (*B2m*) and plotted relative to siCtrl.  
167 Data represent the average of four independent experiments. (F) Representative  
168 images illustrating accumulation of ORO-stained lipid vesicles or droplets in  
169 10T1/2 cells treated with mock, siCtrl, or siLtbp3-4 RNAs and exposed to  
170 adipogenic media for 5 days. Scale bar, 100  $\mu$ m. (G-L) Relative transcript levels  
171 of *Srebfl*, *Cebp $\beta$* , *Cebp $\delta$* , *Ppar $\gamma$* , *Cebpa*, and *Fasn* measured at 0, 8, 24, and 72 h  
172 after adipogenic induction with 10T1/2 cells treated with siCtrl or siLtbp3-4 for 48  
173 h. qRT-PCR values were normalized to *B2m* and plotted relative to siCtrl. Each  
174 value is the average of 3 independent experiments. For figures A-D, there were 10  
175 technical replicas normalized and pooled from four experiments and each replica  
176 was analyzed twice by qRT-PCR. For figure E, the data represent a total of 4  
177 samples for each condition normalized and pooled from four experiments (1 for  
178 each). Figure F is representative of one of 3 independent experiments in which there  
179 was 1 technical replica. For figures G, K, and L each data point represents two  
180 technical replicas from three experiments. Each technical replica was analyzed two  
181 times by qRT-PCR. For figures H, I, and J, each data point represents one technical  
182 replica from three experiments. Each technical replica was analyzed once with  
183 qRT-PCR. Statistical significance was evaluated by Nonparametric, Kruskal-  
184 Wallis test with Dunn's multiple comparisons test (Fig. A-E), or two-way mixed  
185 model analysis of variance (ANOVA) using time and treatment as fixed factors  
186 with Tukey's multiple comparisons test (Fig. G-L). Data are represented as mean  
187  $\pm$  SEM. \* $p < 0.05$ , \*\* $p < 0.01$ , \*\*\* $p < 0.001$ , \*\*\*\* $p < 0.0001$ .

188

189

### 190 **Specificity of *Ltbp3* knockdown**

191 We validated that the effect of siLtbp3-4 is specific for *Ltbp3* by several  
192 approaches. First, four different siRNAs (siLtbp3-1-4), three (siLTBP3-1, 2, and 3)

193 targeted to unique sequences in the *Ltbp3* 3' UTR and one (siLTBP3-4) targeted to  
194 the coding sequence in *Ltbp3* exons 13-14, decreased both *Ltbp3* expression and  
195 cell differentiation, as monitored by *Ppar $\gamma$*  expression (**Fig. 2A and B**). siLtbp3-3  
196 was not quite as effective as siLtbp3-1, 2, or 4 and there appeared to be a  
197 relationship between the degree of *Ltbp3* suppression and *Ppar $\gamma$*  expression (**Fig.**  
198 **2A and B**).

199  
200 Second, we prepared a rescue lentivirus vector containing a cloned *Ltbp3* missing  
201 the 3' UTR. This permitted us to employ siLtbp3-2, which targets the 3' UTR, to  
202 eliminate specifically the endogenous *Ltbp3* transcripts, but which would not  
203 recognize the lentiviral vector encoded *Ltbp3* transcripts, as they are derived from  
204 a cDNA. We validated the occurrence of expressed LTBP3 in 10T1/2 cells, as  
205 detected by immunofluorescence, as well as by measuring LTBP3 protein as well  
206 as transcripts (**SI Fig. 2A-C**). Cells transduced with the rescue LTBP3 lentivirus,  
207 treated with siLtbp3-2, and placed in differentiation medium continued to express  
208 *Ltbp3* mRNA (**Fig. 2C**) and protein (**SI Fig. 2D, E**). These cells were resistant to  
209 the interference of adipogenesis, as measured by *Ppar $\gamma$*  and *Cebpa* expression (**Fig.**  
210 **2D and E**), the percentage of cells with lipid vesicles (**Fig. 2F and G**), and PPAR $\gamma$   
211 protein levels (**SI 2Fig. D and E**). The expression level of the rescue *Ltbp3* mRNA  
212 was consistently ~2 fold higher than that of the endogenous transcripts of *Ltbp3*  
213 gene (**Fig. 2C**). The reason for this is unclear but could relate to the lack of the 3'  
214 UTR or to the viral titer. This question was not pursued. As expected, cells  
215 transduced with a lentivirus expressing *Ltbp3* transcripts were not rescued with  
216 respect to *Ppar $\gamma$*  expression when treated with siLtbp3-4, which recognizes a  
217 coding region of *Ltbp3* mRNA (**SI Fig. 2F and G**). These results indicate that the  
218 effect of siLtbp3-2 mediated *Ltbp3* KD is not the result of an off-target activity.

219  
220  
221  
222  
223

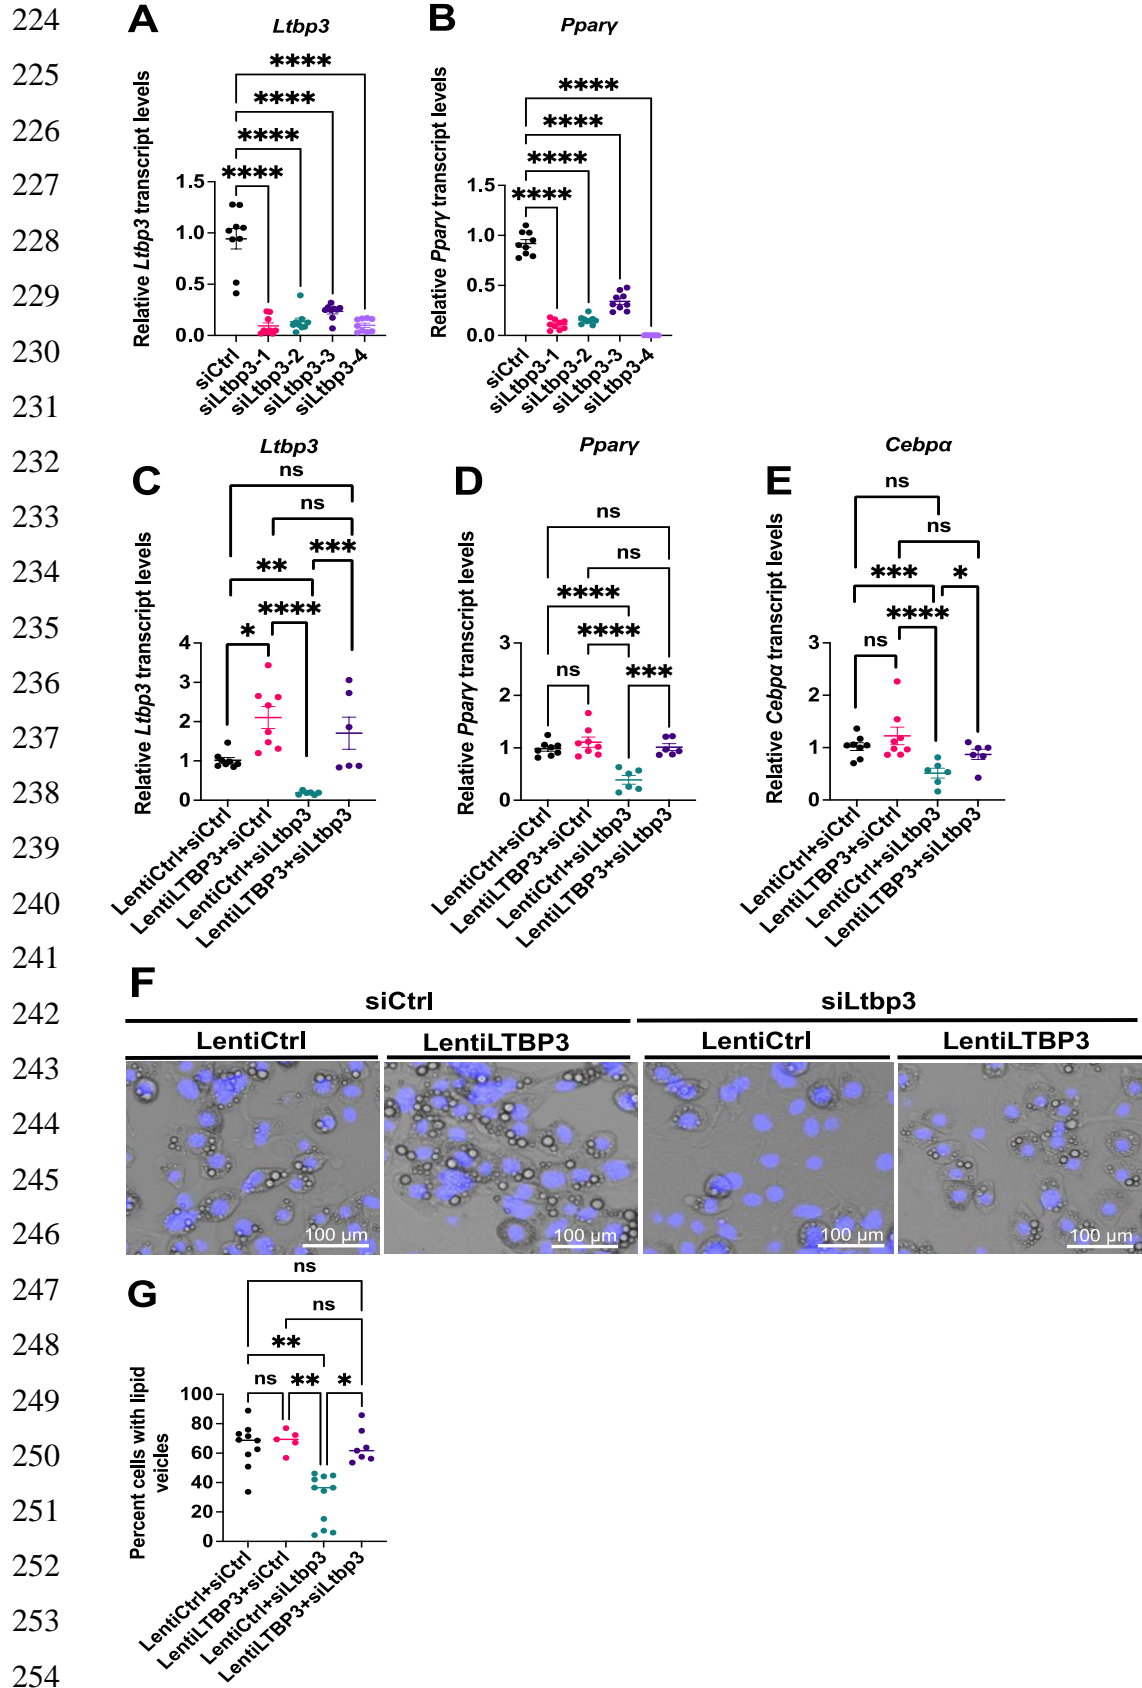



255 **Fig. 2. *Ltbp3* knockdown specificity.** (A and B) Effect of different *Ltbp3* siRNAs  
256 on adipogenesis. Relative mRNA levels of *Ltbp3* and *Ppar $\gamma$*  were measured in  
257 10T1/2 cells treated with siCtrl or si*Ltbp3*-1, 2, 3, or 4, maintained for two days in  
258 basal media, and incubated for three days in adipogenic medium. qRT-PCR values  
259 were normalized to *B2m* and plotted relative to the siCtrl. Data represent the means  
260 of 3 independent experiments with 3 technical replicas for each sample, and each  
261 technical replica was analyzed 2 times by qRT-PCR. (C-E) Relative mRNA levels  
262 of *Ltbp3* (C), *Ppar $\gamma$*  (D), and *Cebpa* (E) in LentiCtrl and LentiLTBP3 cells treated  
263 with siCtrl or si*Ltbp3*-2 for 48 h followed by 72 h of adipogenic induction. Data  
264 represent the means of 3 independent experiments with 1-3 technical replicas for  
265 each group, and each replica was analyzed 2 times by qRT-PCR. (F) Lipid vesicles  
266 in cells rescued by lentivirus mediated expression of *Ltbp3*. Images show  
267 birefringent lipid vesicles and blue DAPI stained nuclei in LentiCtrl and  
268 LentiLTBP3 cells treated with siCtrl or si*Ltbp3*-2 for 48 h followed by 120 h  
269 incubation in adipogenic medium. Scale bar, 100  $\mu$ m. (G) Quantification of cells  
270 with lipid droplets from panel F. For **Fig. F** representative images are from one of  
271 three independent experiments with two-four technical replicas and for **Fig. G** data  
272 are the mean of two independent experiments with 2,000-4,000 cells counted in  
273 each replica. Statistical significance was evaluated by one-way ANOVA with  
274 Dunnett's multiple comparison (**Fig. A and B**) or nonparametric, Kruskal-Wallis  
275 test with Dunn's multiple comparisons test. (**Fig. C-E and G**). Data are represented  
276 as mean  $\pm$  SEM. \* $p < 0.05$ , \*\* $p < 0.01$ , \*\*\* $p < 0.001$ , \*\*\*\* $p < 0.0001$ .

277

278 Third, we tested whether the restraint of adipogenesis by si*Ltbp3*-2 was restricted  
279 to 10T1/2 cells. We monitored the result of *Ltbp3* loss on differentiation of the  
280 mouse preadipocyte line 3T3-L1, the mouse bone marrow-derived mesenchymal  
281 cell line M2, and the mouse bone marrow-derived stromal primary cell (BMSC).  
282 KD of *Ltbp3* transcripts in all three cell types resulted in impaired *Ppar $\gamma$*  expression  
283 (**Fig. 3A-H**). These data plus results with *Ltbp3* KD of primary mouse BMSC  
284 indicate that the *Ltbp3* requirement for adipogenesis is not unique to 10T1/2 cells.

285

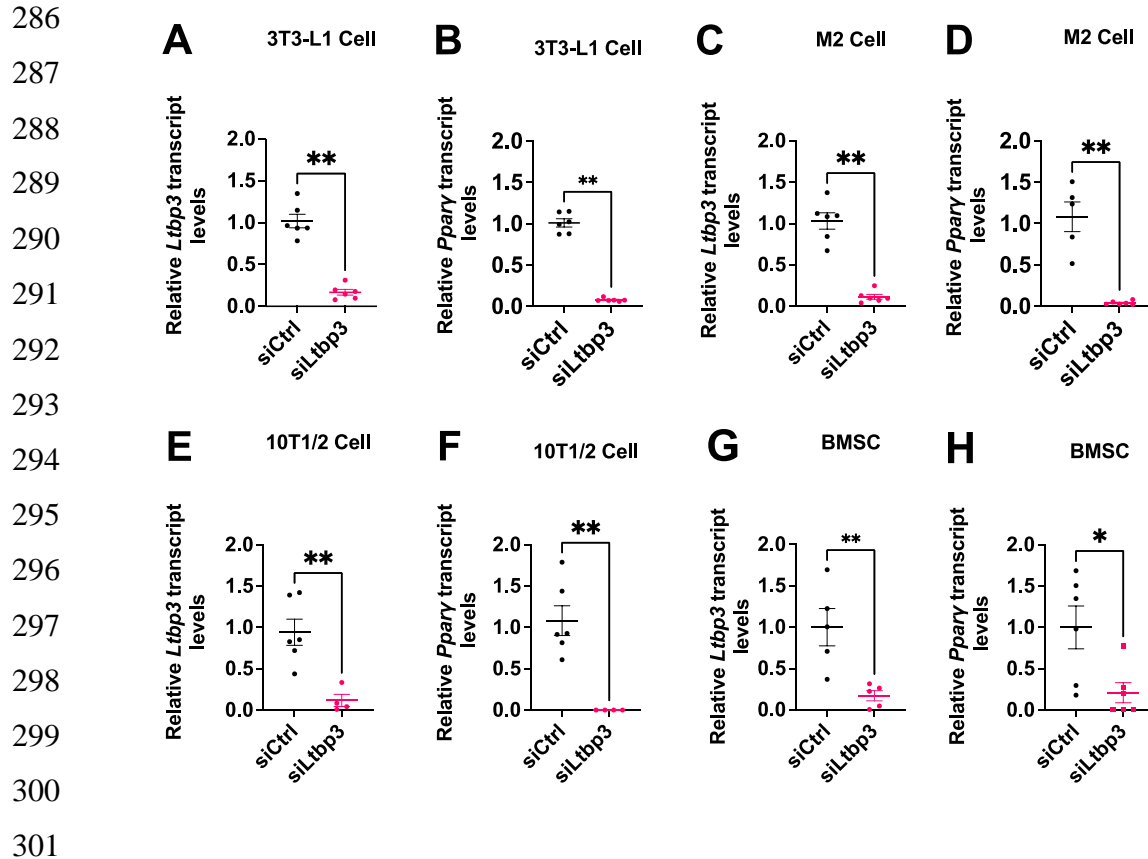

302 **Fig. 3. Effect of *Ltp3* downregulation in 3T3-L1, 10T1/2, M2, and BMSC. (A-**  
303 **H) Relative transcript levels of *Ltp3* and *Pparγ* measured at 96 h post siCtrl or**  
304 **siLtp3-2 treatment (48 h in basal media followed by 48 h of adipogenic stimulation**  
305 **except for BMSC, BMSC were exposed to adipogenic media for 72 h) with 3T3-**  
306 **L1 (A and B), M2 (C and D), 10T1/2 (E and F), and BMSC (G and H) cells. For**  
307 **Fig. A-F, data are the mean ± SEM of 3 independent experiments with one-three**  
308 **technical replicas for each experiment and treatment condition. Each technical**  
309 **replica was analyzed two times by qRT-PCR. For experiments G and H, there were**  
310 **5-6 animals per group and the samples were each assayed in duplicate by qRT-**  
311 **PCR. Statistical significance was evaluated by nonparametric, Mann-Whitney U**  
312 **test (A-H). \*p < 0.05, \*\*p < 0.01, \*\*\*p < 0.001, \*\*\*\*p < 0.0001.**

313  
314  
315  
316

### 317 **Effect of in vivo loss of *Ltbp3***

318 To probe if *Ltbp3* loss in vivo yields decreased fat accumulation, we performed  
319 DEXA scans on wild-type (*WT*) and *Ltbp3* null mice to measure body composition.  
320 DEXA scans revealed that male *Ltbp3* null mice had a ~30% decrease in fat mass  
321 and a corresponding ~13% increase of lean mass by 18 weeks of age (**Fig. 4A** and  
322 **B**). We next visualized the white fat depots to see if specific body fat deposits  
323 differed between *WT* and *Ltbp3* null mice. A clear contrast was apparent in the size  
324 of inguinal (iWAT) and epididymal (eWAT) subcutaneous fat pads between males  
325 of the two genotypes (**Fig. 4C**). As reported previously [18], there was also a  
326 significant loss of body weight in the *Ltbp3*<sup>-/-</sup> animals compared to *Wt* counterparts  
327 (**Fig. 4D**). When we dissected animals, weighed and normalized fat pads to body  
328 weight, we found a 62% loss of eWAT and a 57% loss of iWAT in *Ltbp3* null  
329 compared to *WT* animals (**Fig. 4E** and **F**). However, we observed no significant  
330 difference in liver, a potential site for fat deposition, weights between *WT* and  
331 *Ltbp3*<sup>-/-</sup> animals (**Fig. 4G**). The fat mass loss was not as dramatic in female mice,  
332 which had fat mass losses of less than 18% and a corresponding ~8% increase of  
333 lean mass by age of 18 weeks (**Fig. 4H** and **I**). Female mice of the two genotypes  
334 also displayed no significant differences in body weight, eWAT, iWAT, or liver  
335 weight (**Fig. 4J-M**). The decreased amount of white fat in *Ltbp3*<sup>-/-</sup> animals was  
336 consistent with the in vitro findings described above. However, *Ltbp3* loss might  
337 have indirect or systemic effects that modulate fat accumulation in the animal.  
338 Therefore, we evaluated the ability of primary *WT* BMSC to differentiate into  
339 adipocytes. When we treated freshly isolated *WT* BMSC with si*Ltbp3*-2 and  
340 induced them to differentiate, we observed a significant decrease in *Ltbp3*  
341 transcripts (**Fig. 3G**) and protein (**SI Fig. 3A** and **B**), the degree of differentiation  
342 measured by *Pparγ* mRNA (**Fig. 3H**) and protein levels (**SI Fig. 3A** and **C**), and  
343 the number of cells with lipid vesicles (**SI Fig. 3D** and **E**). We observed a similar  
344 inhibition of adipogenesis as measured by the number of cells containing lipid  
345 vesicles (**SI Fig. 3F** and **G**) and *Pparγ* mRNA transcripts (**Fig. 4N**) using BMSC  
346 derived from *Ltbp3*<sup>-/-</sup> bone marrow (**Fig. 4O**). Thus, *Ltbp3* loss mediated by either  
347 siRNA mediated KD or gene targeting impairs adipogenesis.

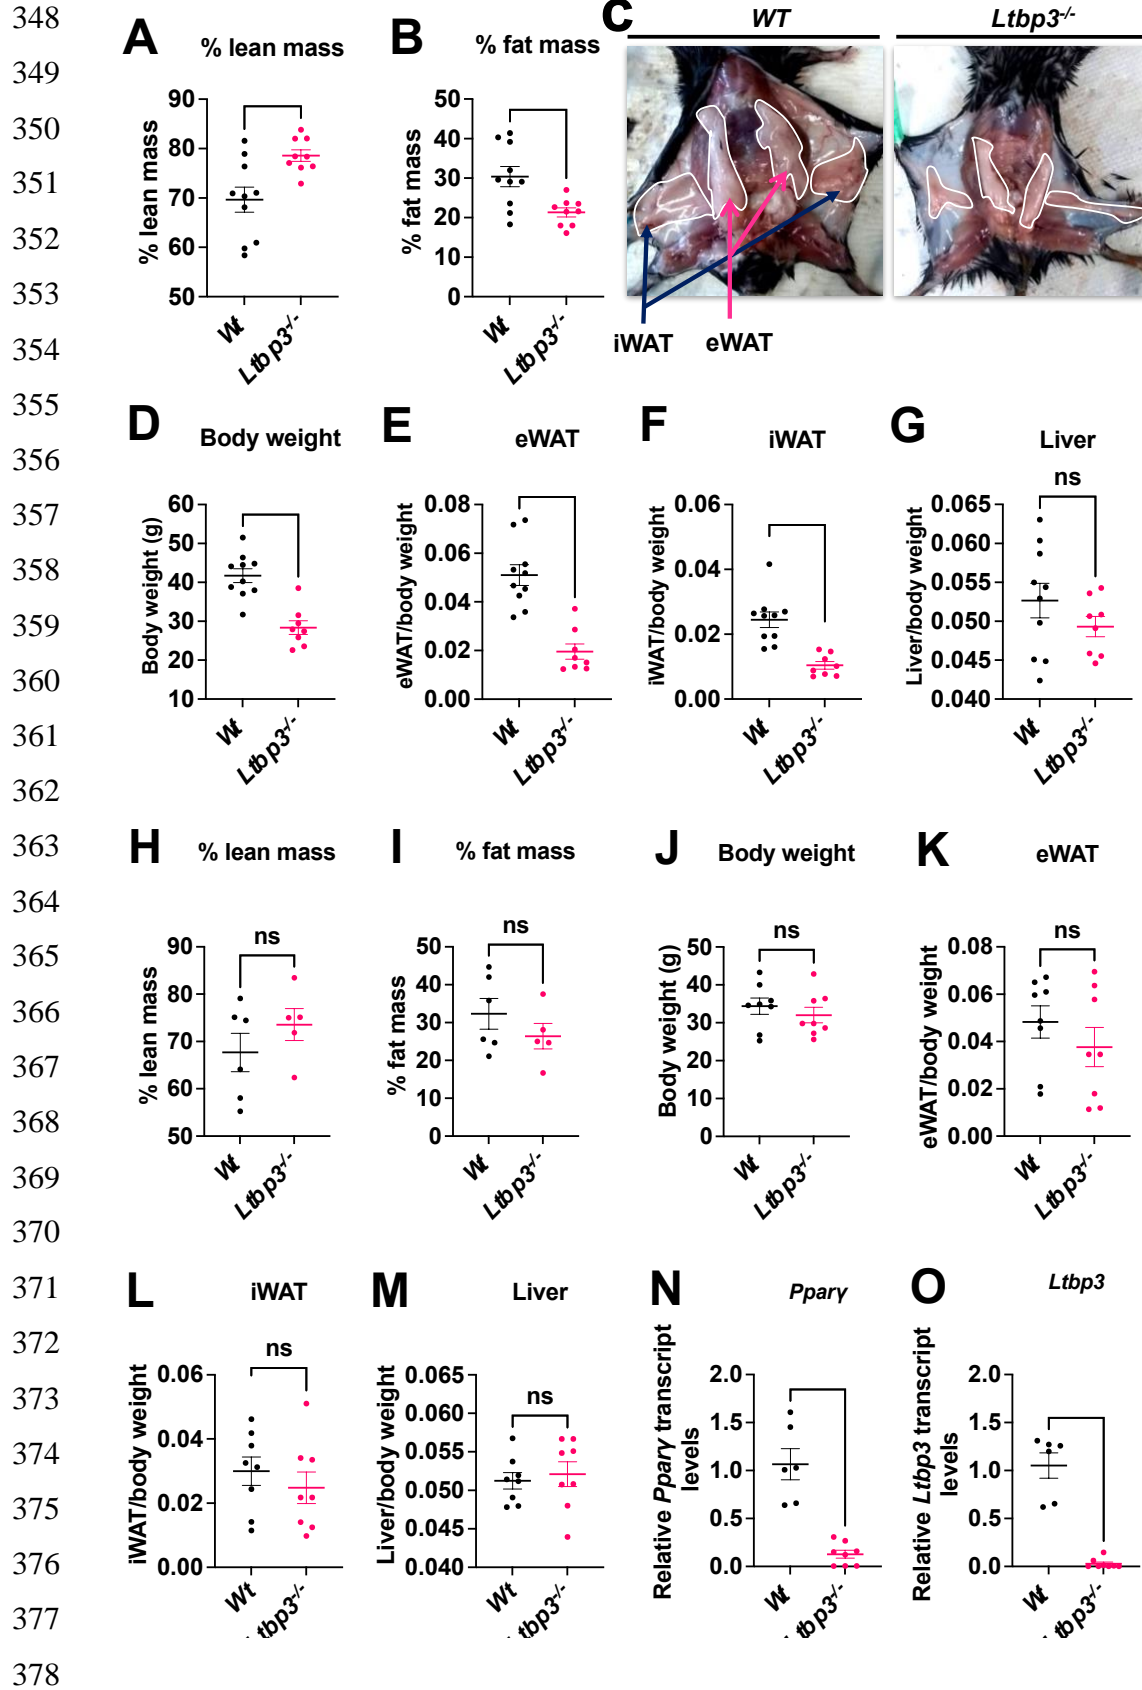

379 **Fig. 4. Reduced adipose tissue in *Ltbp3*<sup>-/-</sup> mice.** (A and B) DEXA scans for body  
380 composition of 18-week-old male mice. (A) percent lean mass, (B) percent fat  
381 mass. (C) Representative images of the fat depots of 18-week-old *WT* and *Ltbp3*<sup>-/-</sup>  
382 male mice; epididymal white adipose tissue (eWAT) and inguinal white adipose  
383 tissue (iWAT). (D) Body weights of 18-week-old *WT* and *Ltbp3*<sup>-/-</sup> male mice. (E-  
384 G) Relative weights of eWAT, iWAT, and liver normalized to body weights of 18-  
385 week-old *WT* or *Ltbp3*<sup>-/-</sup> male mice. (H and I) DEXA scans for body composition  
386 of 18-week-old female mice. H percent lean mass, I percent fat mass. (J) Body  
387 weights of 18-week-old *WT* and *Ltbp3*<sup>-/-</sup> female mice. (K-M) Relative weights of  
388 eWAT, iWAT, and liver normalized to body weights of 18-week-old *WT* or  
389 *Ltbp3*<sup>-/-</sup> female mice. (N and O) Relative transcript levels of *Pparγ* and *Ltbp3*  
390 measured at 120 h post differentiation treatment (48 h in basal media followed by  
391 72 h of adipogenic stimulation) of *WT* and *Ltbp3*<sup>-/-</sup> BMSC. For experiments in parts  
392 **Fig. 4A-B, D-G** and **J-M** there were 8-10 animals per group, and for part  
393 **Fig. 4H-I** there were 5-6 animals per group. For experiments **N** and **O**, there were  
394 6-8 animals per group and the samples were each assayed in duplicate for the qRT-  
395 PCR. Data are represented as mean ± SEM. Statistical significance was confirmed  
396 by using nonparametric, Mann-Whitney U test (**Fig. A-B** and **D-O**).  $p < 0.05$ , \*\* $p$   
397  $< 0.01$ , \*\*\* $p < 0.001$ , \*\*\*\* $p < 0.0001$ .

398

399

#### 400 **Requirement for TGFβ**

401 LTBP null phenotypes in both humans and mice have been related to decreased  
402 TGFβ signaling, consistent with the hypothesis that LTBPs are critical mediators  
403 of TGFβ function. However, decreased TGFβ resulting from the loss of LTBP3 is  
404 unlikely to account for impaired adipogenesis, since TGFβ is a known suppressor  
405 of adipocyte differentiation. Thus, LTBP3 loss and consequent decrease in active  
406 TGFβ should enhance differentiation. Nevertheless, we tested the potential  
407 involvement of TGFβ in our system by several approaches. We initially monitored  
408 the effect of TGFβ supplementation on *Ltbp3* KD 10T1/2 cells (**SI Fig. 4A** and **B**).  
409 Addition of TGFβ1 yielded cultures with enhanced impairment of differentiation

410 compared to those with *Ltbp3* KD alone, indicating, as predicted, that TGF $\beta$  loss  
411 was not responsible for the inhibition of adipogenesis (**SI Fig. 4A and B**).

412

413 We next examined the level of TGF $\beta$  signaling in control and LTBP3 KD cells  
414 cultures by monitoring phospho-SMAD3 (p-SMAD3) levels, as p-SMAD3 can be  
415 used as a surrogate marker for TGF $\beta$  activity. Indeed, we observed an increase  
416 (~2.3-fold) in p-SMAD3 after treatment with the siLtbp3-2 (**Fig. 5A and B**),  
417 implying that there was an increase in active TGF $\beta$  after inhibition of LTBP3  
418 production. We reasoned that if excess TGF $\beta$  produced after *Ltbp3* KD was  
419 responsible for the inhibition of adipogenesis, prevention of TGF $\beta$  signaling either  
420 with an inhibitor to the TGF $\beta$  receptor kinase or a neutralizing antibody should  
421 overcome the KD effect. Addition of the low molecular weight TGF $\beta$  type I  
422 receptor kinase (ALK5) inhibitor (SB431542) effectively decreased p-SMAD3  
423 levels (**Fig. 5A**), and rescued the *Ltbp3* KD phenotype as monitored by recovery of  
424 PPAR $\gamma$  protein (**Fig. 5C and D**) and transcript levels (**SI Fig. 4C and D**), as well as  
425 the number of cells with lipid vesicles (**Fig. 5E and F**). As expected, there was no  
426 effect of SB431542 treatment on LTBP3 accumulation (**Fig. 5A-D, SI Fig. 4C**).

427

428

429 We also attempted to rescue the *Ltbp3* KD phenotype, by addition of an antibody  
430 that neutralizes all three isoforms of TGF $\beta$  to siCtrl or siLtbp3-2 treated cells.  
431 Although an isotype control antibody had no effect on LTBP3 or p-SMAD levels  
432 in siCtrl or siLtbp3-2 treated cells, the inclusion of an antibody that neutralized  
433 TGF $\beta$  resulted in a significant decrease in p-SMAD3 induction by siLtbp3-2 (**SI**  
434 **Fig. 5A and B**). In addition, when we treated cells with the TGF $\beta$  neutralizing  
435 antibody, there was an increase in PPAR $\gamma$  protein (**SI Fig. 5C and D**). Although the  
436 increase in PPAR $\gamma$  protein was modest, when we compared the numbers of siLtbp3-  
437 2 treated cells plus neutralizing antibody vs. cells treated with control antibody  
438 containing lipid vesicles, we observed that the recovery of the adipogenic state was  
439 highly significant (**SI Fig. 5E and F**). The fact that the effect of antibody treatment

440 was less than that observed with the kinase inhibitor may relate to the greater ease  
441 of the low molecular weight inhibitor, compared to the antibody, to reach its target.

442

443 These results are consistent with increased rather than decreased TGF $\beta$ . Therefore,  
444 we quantified the level of active TGF $\beta$  in cultures of siLtp3-2 treated 10T1/2 cells  
445 in regular and adipogenic media. When cells were cultured in regular medium, the  
446 presence of the siLtp3 clearly enhanced the level of TGF $\beta$  and the induction was  
447 blocked by both the TGF $\beta$  receptor 1 kinase inhibitor as well as the TGF $\beta$  specific  
448 neutralizing antibody (**Fig. 5G**). We observed a lower, but significant, increase in  
449 TGF $\beta$  under the different treatments when cells were cultured in the adipogenic  
450 medium (**Fig. 5H**). The decreased TGF $\beta$  levels in cultures with adipogenic medium  
451 was due to the effect of the dexamethasone in the adipogenic culture medium on  
452 the plasmid promoter used in the assay. Together these data indicate that increased  
453 TGF $\beta$  signaling is responsible for the inhibition of differentiation upon loss of  
454 LTBP3.

455

456

457

458

459

460

461

462

463

464

465

466

467

468

469

470

471

472

473

474

475

476

477

478

479

480

481

482

483

484

485

486

487

488

489

490

491

492

493

494

495

496

497

498

499

500

501

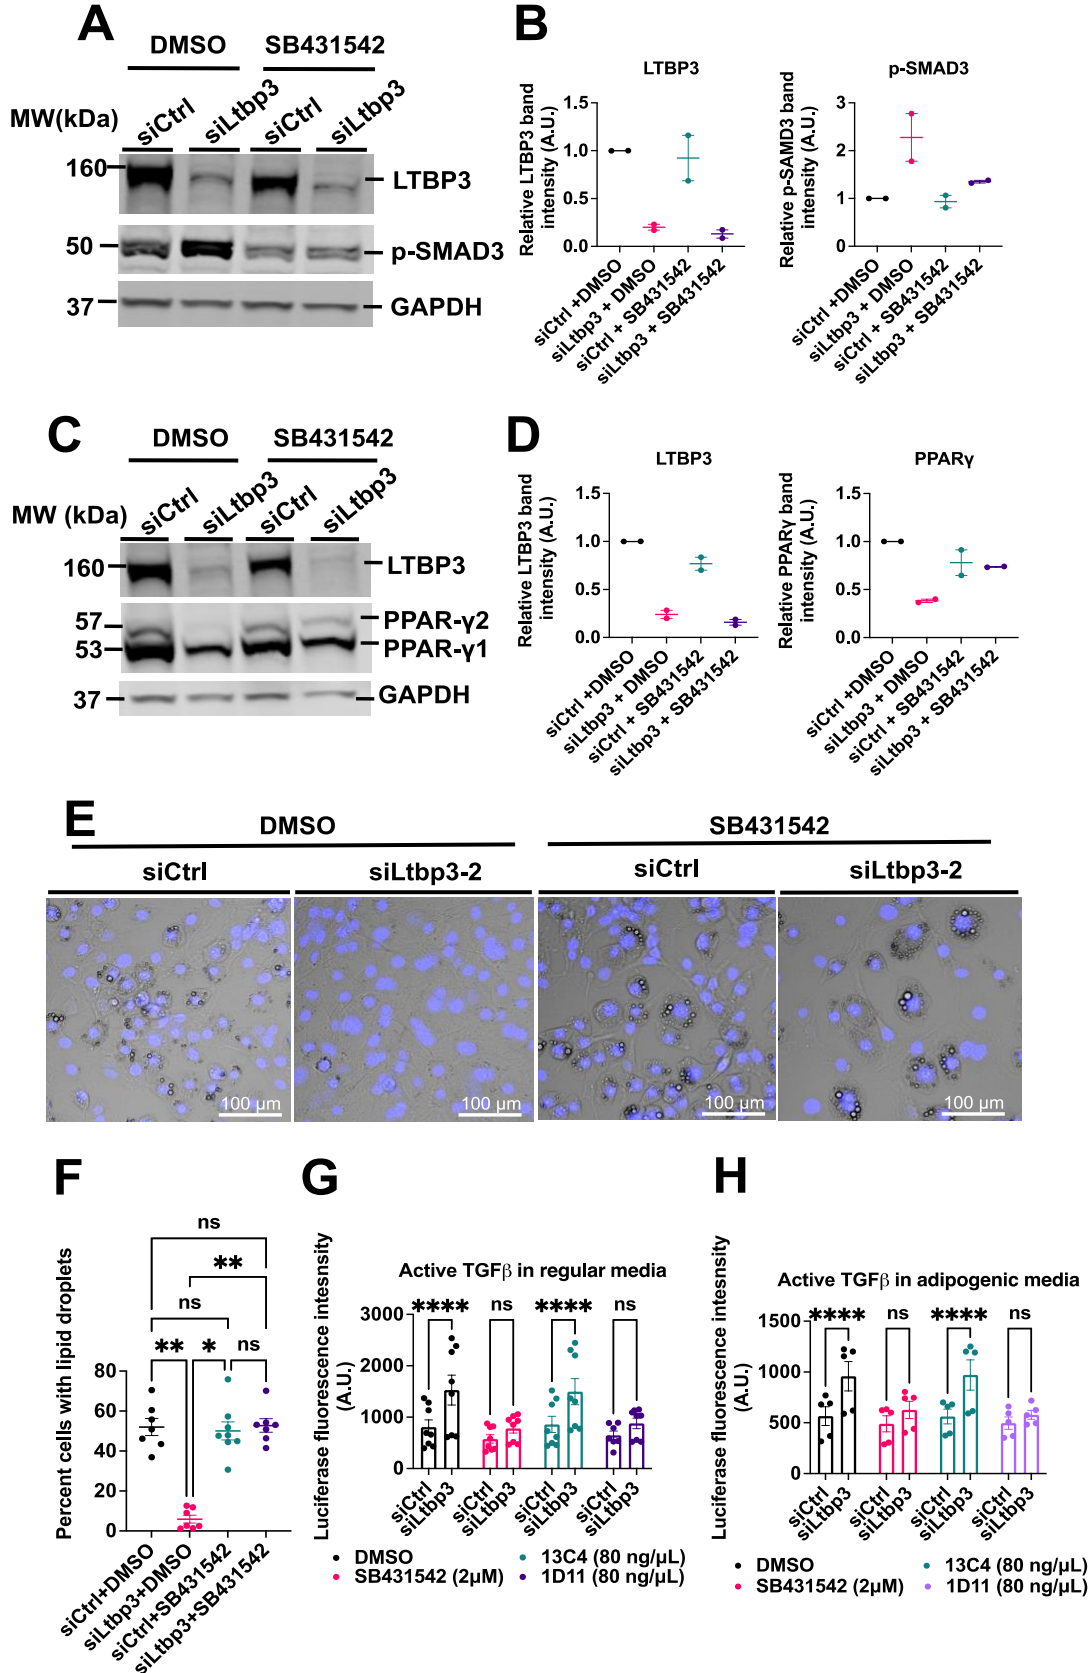



502 **Fig. 5. Heightened TGF $\beta$  inhibits adipogenesis.** (A-F) TGF $\beta$  receptor kinase  
503 inhibitor reverses the LTBP3 KD effect. 10T1/2 cells were treated with SB431542  
504 as described in Methods. (A-D) Cell lysates were analyzed by immunoblotting with  
505 antibodies to LTBP3, PPAR $\gamma$ , p-SMAD3, and GAPDH. The immunoblot is  
506 representative of one of two independent experiments. There was 1 technical  
507 replica for each treatment condition. (E) Images showing accumulation of lipid  
508 droplets in 10T1/2 cells treated with siCtrl or siLtbp3-2 and exposed to TGF $\beta$   
509 receptor1 kinase (ALK5) inhibitor as described in Methods. Representative images  
510 are shown from one of three independent experiments. For each experiment there  
511 was 1 technical replica and 4-5 fields were counted for each replica (1,800-4,000  
512 cells for each replica). Scale bars, 100  $\mu$ m. (F) Quantification of percent cells with  
513 lipid droplets for panel E. (G and H) Active TGF $\beta$  produced by siCtrl or siLtbp3-  
514 2 treated 10T1/2 cells was determined using a luciferase reporter cell assay. 10T1/2  
515 cells were treated as described in Methods. The **Fig. G** represents the values from  
516 three independent experiments and **Fig. H** from two independent experiments. Each  
517 treatment had 2-3 technical replicas. Statistical significance of **Fig. F** was evaluated  
518 by the using nonparametric, Kruskal-Wallis test with Dunn's multiple comparisons  
519 test. Data are represented as means  $\pm$  SEM.  $p < 0.05$ , \*\* $p < 0.01$ , \*\*\* $p < 0.001$ ,  
520 \*\*\*\* $p < 0.0001$ .

521

522

## 523 Discussion

524 The LTBP3s are important for the effective secretion and localization of latent TGF $\beta$   
525 into the extracellular matrix and are perceived to be crucial for the activation of the  
526 latent cytokine [19]. Here we present evidence that LTBP3 loss inhibits  
527 preadipocyte and mesenchymal stem cell adipogenesis, as measured by the  
528 impaired accumulation of lipid vesicles and by the decrease of specific transcription  
529 factor expression in both cultured and primary cells. We documented the specificity  
530 of the effect by rescuing siRNA mediated inhibition using a lentiviral vector  
531 expressing an *Ltbp3* mRNA resistant to siRNA mediated degradation, by blocking  
532 *Ltbp3* expression in four different cell types with consequently impaired

533 adipogenesis, and by demonstrating that both *Ltbp3*<sup>-/-</sup> cells and animals have  
534 impaired ability to form adipocytes. We rescued adipogenesis in LTBP3 KD cells  
535 by blocking TGFβ signaling either with a TGFβ neutralizing antibody or by  
536 inhibiting the TGFβ receptor kinase I indicating that active TGFβ is the effector  
537 molecule in LTBP3 silencing. Our studies are the first to identify an LTBP required  
538 for stem cell differentiation.

539

540 Our results are consistent with the known inhibitory effect of TGFβ on adipogenesis  
541 with both pre-adipocytes and bone derived mesenchymal cells [16,17,  
542 20,21,22,23]. Additionally, Clouthier et al. documented that transgenic  
543 overexpression of human TGFβ1 in white adipose tissue hampered adipogenesis  
544 [24]. These earlier studies revealed that TGFβ signaling represses C/EBPβ and  
545 C/EBPδ functions by binding to activated Smad3 [16]. Similarly, Smaldone et al.  
546 [25] reported that heightened TGFβ signaling in cultured marrow cells from mouse  
547 limbs deficient in fibrillin-1 impaired adipogenesis, as measured by PPARγ  
548 expression. An interesting question is whether LTBP3 controls the differentiation  
549 of MSCs along lineages other than the adipogenic lineage or is there lineage  
550 specificity. Since TGFβ is known to inhibit chondrogenesis [26, 27] and  
551 osteogenesis [28], we expect that loss of LTBP3 will impair differentiation along  
552 these additional pathways.

553

554 Unexpectedly, we found a sexual dimorphism with regard to adiposity and LTBP3  
555 loss with females exhibiting no statistically significant differences in the absence  
556 of LTBP3. Sexual dimorphism in fat accumulation has been described for a subset  
557 of mice with fibrillin1 mutations [29]. However, there appear to be no other  
558 publications indicating that loss of additional matrix components yields sex-  
559 specific differences in weight gain. This could, however, reflect the common  
560 practice of primarily focusing on the outcomes with male mice.

561

562 An interesting question is whether other LTBPs, for example LTBP1, might  
563 compensate or cooperate with LTBP3 during adipogenesis. Or conversely, is

564 suppression of LTBP1, 2, and 4 required for proper adipogenesis? We have shown  
565 that the levels of expression of other LTBPs all decrease dramatically during the  
566 time period in which we have measured adipogenesis. However, we cannot rule out  
567 the re-expression at later times. It does appear that *Ltbp3* null animals display  
568 decreased fat accumulation indicating that any compensation by a second LTBP is  
569 minimal. Moreover, genetic studies in mice have failed to reveal any compensation  
570 of the loss of LTBP3 in either lung or aorta when LTBP is missing in the presence  
571 of other LTBPs [30, 31].

572

573 The participation of LTBPs in stem cell differentiation has not been extensively  
574 studied. Koli et al. [32], who examined human mesenchymal stem cell osteogenic  
575 differentiation, and Gualandris et al. [33], who monitored mouse embryoid body  
576 differentiation, both concluded that differentiation required TGF $\beta$  and effective  
577 activation of latent TGF $\beta$  required the participation of an LTBP. Thus, the loss of  
578 an LTBP yielded diminished TGF $\beta$  levels. However, our findings indicate LTBP3  
579 down regulation results in an increase, rather than decrease, in active TGF $\beta$  during  
580 adipogenesis; a finding more in concert with those of Smaldone et al. (vide supra)  
581 [25].

582

583 Several lines of experimentation have led to the concept that LTBPs support latent  
584 TGF $\beta$  activation and that the loss of LTBP1 or LTBP3 results in decreased active  
585 cytokine levels. Early investigations with antibodies to LTBP1 indicated that  
586 interference with LTBP1 reduced TGF $\beta$  activity [34,35]. Subsequent phenotypic  
587 analysis of mice with LTBP1 and LTBP3 null mutations revealed pathologies also  
588 congruent with loss of TGF $\beta$  function [18,36,37]. The discovery that integrin  
589 binding to the TGF $\beta$  propeptide facilitated LLC activation suggested that force was  
590 necessary for latent TGF $\beta$  activation and that the immobilization of the SLC by  
591 covalent binding to an LTBP or GARP/LRRC32 provided the required traction  
592 [38,39,40]. The SLC crystal structure revealed how integrin pulling at one end of  
593 the latent complex would distort the propeptides and liberate active TGF $\beta$  [41,42].  
594 Finally, mice with a mutation in the TGF $\beta$ 1 propeptide residue that binds to the

595 LTBP or GARP/LRRC32 display phenotypes overlapping with those of TGF $\beta$  1  
596 null mice, implying a requirement for LLC formation to facilitate latent TGF $\beta$ 1  
597 activation [3]. Therefore, binding of the SLC to an LTBP is thought to be required  
598 to develop the tension necessary for integrin mediated activation of the latent  
599 complex. The phenotypes apparent after LTBP3 loss in mice, such as premature  
600 ossification of the synchondroses [18], amelogenesis imperfecta [36], and  
601 inhibition of thoracic aortic aneurysms in mice with Marfan syndrome [30], are  
602 consistent with decreased active TGF $\beta$  levels, commensurate with a requirement  
603 for LTBP3 to target the LLC to the extracellular matrix (ECM) for latent TGF $\beta$   
604 activation. However, it must be stated that in none of these examples has a decrease  
605 in levels of mature TGF $\beta$  in the tissue been rigorously demonstrated.

606

607 Recently Halbgebauer et al. [43] reported that knockout of LTBP3 in human  
608 Simpson-Golabi-Behmel cells and human primary adipose-derived stromal cells  
609 had no effect upon adipogenesis with respect to markers of white fat differentiation,  
610 such as PPAR $\gamma$ , but did affect the expression of UCP-1, a marker for brown fat. It  
611 is unclear why these results differ from the results reported here, but there are  
612 differences in cell source, differentiation medium, method of LTBP depletion, and  
613 length of time of the assay. It is important to note that the length of time of our  
614 assays were limited to 5-7 days because of the transitory nature of the KD. It will  
615 be important to clarify the explanation (s) for the differences between our results  
616 and those of Halbgebauer et al.

617

618 Although our results are contradictory to these earlier results and their interpretation  
619 indicating loss of LTBP yields decreased TGF $\beta$ , our findings are in agreement with  
620 multiple reports describing enhanced TGF $\beta$  levels after perturbation or loss of  
621 specific matrix proteins. Neptune et al. [44] reported that enhanced levels of active  
622 TGF $\beta$  accounted for aspects of Marfan syndrome caused by mutations in fibrillin1,  
623 a major partner for LTBP binding and crosslinking [45,46]. The authors reasoned  
624 that under conditions of decreased or defective fibrillin1, LLCs were improperly  
625 sequestered in the ECM permitting inappropriate latent TGF $\beta$  activation. Recent

626 experiments from the Ramirez laboratory demonstrating that fibrillin1 loss yields  
627 enhanced levels of active TGF $\beta$ , especially with BMSC (*vide infra*), support this  
628 interpretation [25,47]. Heightened levels of TGF $\beta$  signaling are also observed upon  
629 perturbation of other ECM proteins, especially those that interact with fibrillin,  
630 including elastin [48,49], ADAMTSL2 [50], MAGP1 [51,52], LTBP4 [53], Fibulin  
631 4 [54,55], and proteoglycans [56,57,58]. Most recently, Abriel et al. [59] described  
632 heightened levels of TGF $\beta$  in the zebrafish outflow tract with deletions of LTBP1  
633 and 3. Similarly, a recent report of LTBP1 with C-terminal truncation in human  
634 describes heightened TGF $\beta$  levels in cultured cells [60].

635

636 Several different mechanisms may account for the heightened TGF $\beta$  observed upon  
637 ECM protein loss. Increased active TGF $\beta$  in mice with null mutations for MAGP-  
638 1 [51,52] or proteoglycans [56,57,58] may represent a deficiency of TGF $\beta$  binding  
639 molecules. Alternatively, enhanced TGF $\beta$  levels observed after perturbation of  
640 amount or distribution of proteins, such as fibrillin, involved in the binding of latent  
641 TGF $\beta$  complexes may reflect the misdirection and inappropriate activation of latent  
642 complexes, as originally proposed by Neptune et al. [44]. Increased TGF $\beta$  observed  
643 after the loss of elastin, LTBP4, or ADAMTSL2 [48,49,50,53] may reflect the  
644 response, i.e., increased production of the inducer of matrix protein production  
645 (TGF $\beta$ ), of cells to a failed matrix [61].

646

647 However, these explanations fail to account for our observations and those of Abriel  
648 et al. [59]. The earlier results, unlike our studies, all measured TGF $\beta$  changes under  
649 conditions in which there is no reported decrease in LLC production. In our  
650 experiments active TGF $\beta$  is unlikely to derive from an LLC, as LTBP1, 2, and 4  
651 levels decrease significantly during differentiation. However, this possibility has  
652 not yet been excluded by our *in vitro* experiments that are relatively short term.  
653 Alternatively, the SLC could bind to GARP or LRRC32, but these molecules are  
654 not known to be expressed by adipocytes. It is also possible that direct activators of  
655 the SLC may be present or, alternatively, the *Ltbp3* KD cells might directly release  
656 mature TGF $\beta$ . The exploration of these possible mechanisms is currently under

657 investigation, as well as the basis for the loss of LTBP3 yielding opposite effects in  
658 different cells.

659

660

## 661 **Materials and Methods**

662

### 663 **Mice**

664 Generation of *Ltbp3*<sup>-/-</sup> mice was described previously [18]. All animal experiments  
665 were performed with approval from the Institutional Animal Care and Use  
666 Committees of the New York University Grossman School of Medicine. Mice were  
667 fed a standard chow diet (13% kcal fat, LabDiet, no. 5053) with DietGel® Boost  
668 (72-04-5022 2 oz (56 g). All experiments were performed with adult male mice,  
669 approximately 18 weeks of age.

670

### 671 **Body composition**

672 Body composition (% fat mass and % lean mass) of 18-week-old, age matched  
673 *Ltbp3*<sup>-/-</sup> and *WT* male and female mice was assessed using a Lunar PIXImus Dual-  
674 X-ray energy absorptiometry (DEXA) instrument (Lunar Corp., Madison, WI). At  
675 the end of experiments, mice were euthanized with CO<sub>2</sub>, opened to visualize fat  
676 depots, and photographed. Adipose tissues, eWAT, iWAT, and liver were excised  
677 and weights determined.

678

### 679 **Cell lines and primary cells**

680 C3H/10T1/2 cells were obtained from ATCC, (Manassas, VA; CCL-226),  
681 HEK293T cells from Dr. D. Bar-Sagi, M2 mouse Bone Marrow Stromal Cell  
682 (BMSC) from Dr. P. Mignatti, and 3T3-L1 cells from Dr. R. Schneider, NYU  
683 Grossman School of Medicine. BMSC were isolated as reported [62] from 8-week-  
684 old C57BL/6J male mice and cultured at 37°C with 5% CO<sub>2</sub>. Cells were maintained  
685 in DMEM (Corning;10-013-CV) supplemented with 10% FBS (Thermo Fisher  
686 Scientific, Gibco™16140-071) and 1% Penicillin/Streptomycin (Thermo Fisher  
687 Scientific, Gibco™ 15140-122). Media was changed on alternate days until the 5th

688 day, when cells were passaged using 0.05% Trypsin-EDTA (Thermo Fisher  
689 Scientific; 25300-062), replated, and expanded for another two days before use.  
690 HEK 293T, 3T3-L1, 10T1/2, and M2 cells were subcultured every 3 days and  
691 maintained in DMEM supplemented with 10% heat-inactivated FBS and 1%  
692 Penicillin/Streptomycin.

693

#### 694 **Adipogenic differentiation**

695 For adipogenic differentiation experiments, BMSC cells were seeded at a density  
696 of  $1 \times 10^6$  cells/well in a cluster of 6 well plates. Other cells were seeded at a density  
697 of  $\sim 3 \times 10^3$  cells/cm<sup>2</sup> in 6 well cluster plates. At >95% confluency, cultures were  
698 changed to mouse adipogenic differentiation media (Stem Cell Technology,  
699 Vancouver Canada; 05507), allowed to differentiate, and either harvested or fixed  
700 with 4% PFA at the times specified.

701

#### 702 **RNA silencing**

703 siRNA transfections were carried out using 20 pmol of siRNA (**SI Table 1**)  
704 targeting LTBP3 (siLtp3-1-4) and lipofectamine RNAiMAX (Invitrogen,  
705 Waltham, MA; 13778-075) according to the manufacturer's protocol. Cells were  
706 assayed on days 3 and 5 post initiation of adipogenic differentiation for gene  
707 expression at mRNA and protein levels.

708

#### 709 **Quantification of cell number**

710 For quantification of total cell number for the computation of the percent cells with  
711 lipid droplets or vesicles, on day 5 post adipogenesis initiation, cells were fixed  
712 with 4% PFA and washed 3 times with 1X PBS. DAPI (Thermo Fisher Scientific;  
713 62248) staining (0.66  $\mu\text{g}/\mu\text{L}$ ) was performed for 5 min at room temperature  
714 followed by washing 3 times with 1X PBS. Cells were photographed using the Bio-  
715 Red, ZOE<sup>TM</sup> Fluorescent Cell Imager. Nuclei (blue) and cells with lipid vesicles  
716 (white) were counted manually. The percentage of cells with lipid vesicles was  
717 calculated using the formula: Percentage of cells with lipid vesicles = (Number of  
718 cells with lipid droplets/Total number of nuclei)  $\times$  100.

719 **TGF $\beta$  inhibition or supplementation experiments**

720 Forty-eight hours post siRNA treatment, siCtrl or siLtbp3-2 cells were exposed to  
721 the pan-TGF $\beta$  neutralizing antibody 1D11 (Bio X Cell, Lebanon, NH;1D11.16.8,  
722 BP0057; 80 ng/mL) or an isotype-matched murine IgG (13C4; gift of F. Ramirez,  
723 Mount Sinai School of Medicine) in regular media for 4 h and then in adipogenic  
724 media for 5 days with fresh medium added after 3 days. On day 5, post adipogenic  
725 treatment, cells were fixed with 4% PFA and stained with ORO. For the inhibition  
726 of TGF $\beta$  type I receptor, LTBP3 KD cells were treated with 2  $\mu$ M kinase inhibitor  
727 SB431542 (Millipore Sigma; S4317-5MG) or DMSO as a vehicle control for  
728 SB431542 in basal media for 4 h followed by incubation in differentiation media  
729 supplemented with 2  $\mu$ M inhibitor for 3 to 5 days. Cells were fixed using 4% PFA  
730 followed by DAPI staining and imaging as described below. To test the effect of  
731 TGF $\beta$  supplementation, cultured cells treated with siCtrl or siLTBP3-2 cells for 48  
732 h were incubated with dosages of 0, 0.062, or 1.25 ng/mL of TGF $\beta$ 1 (R & D  
733 Systems; 7346-B2-005) in adipogenic media for 5 days and assayed for mature  
734 adipocyte formation based on cells with lipid vesicles or lipid droplets.

735

736 **Construction of lentivirus (LV) expressing *Ltbp3***

737 Full-length *Ltbp3* cDNA (VectorBuilder; Chicago, IL) was cloned into the  
738 pLV[Exp]-EGFP:T2A:Puro-EF1A vector through Vector Builder services  
739 (VB200618-1318juf). The final plasmid was sequenced to confirm correct insertion  
740 of *Ltbp3* ORF. The lentiviral particles were produced by Vector Builder (titer  $\sim$ 1x  
741  $10^8$ /mL).

742



743 **LTBP3 production in vitro**

744 To quantify in vitro LTBP3 production, we transduced cells with either pLV[Exp]-  
745 Puro-EF1A>{mLtp3[NM\_008520.3]} (VB200618-1318juf) or control vector  
746 pLV[Exp]-EGFP:T2A:Puro-EF1A>mCherry (VB160109-10005) at a multiplicity  
747 of infection of 5-10. LTBP3 synthesis and secretion was measured by  
748 immunofluorescence (day 6 post lentiviral transduction) and by immunoblotting of  
749 cell lysates (day 8 post transduction).

750

751 **RNA isolation, cDNA synthesis, and quantitative RT-PCR**

752 Total RNA was isolated using QIAzol lysis reagent (QIAGEN, Hilden, Germany;  
753 79306) and QIAGEN Mini RNeasy kit (QIAGEN; 74004). Genomic DNA was  
754 digested using RNase-Free DNase (QIAGEN; 79254). Equal amounts of RNA  
755 were converted into cDNA using an iScript cDNA synthesis kit (Bio-Rad, Hercules,  
756 CA; 1708891) following the manufacturer's instructions. Quantitative Real-Time  
757 PCR for mRNA levels were measured on a 7500 FAST RT-PCR using TaqMan  
758 probe and universal advanced master mix (Thermo Fisher Scientific, TaqMan™  
759 Fast Universal PCR Master Mix (2X), AmpErase™ UNG, 4367846). Relative  
760 mRNA expression was determined by the  $\Delta\Delta C_t$  method normalized with  
761 housekeeping genes beta-2 microglobulin (*B2m*). Fold change relative mRNA  
762 expression was determined by  $2^{-\Delta\Delta C_t}$  as described [62,63]. The list of primers used  
763 is given in **SI Table 2**.

764

765 **Protein extraction and immunoblotting**

766 Cells were lysed in RIPA lysis buffer containing 50 mM Tris pH 7.5, 150 mM  
767 NaCl, 1% NP-40, 0.5% sodium deoxycholate, 0.1% SDS, supplemented with  
768 protease (Complete, Roche) and phosphatase (PhosSTOP, Roche) inhibitor  
769 cocktails, and 1 mM phenylmethylsulfonyl fluoride (Cell Signaling, Danvers, MA;  
770 8553). Cell lysates were cleared by centrifugation (15,000 g for 15 min at 4 °C).  
771 Protein concentrations were determined using Pierce BCA Protein Assay Kit  
772 (Thermo Scientific, 23227). Equal amounts of protein (25 µg) were separated by  
773 SDS-PAGE, and transferred onto Nitrocellulose Membranes (Bio-Rad; 1620212)

774 using ExpressPlus™ PAGE Gel 4-20% (GeneScript, Piscataway, NJ; M42015) wet  
775 transfer (60V for 2 h). Thereafter, membranes were blocked for 1 h in intercept  
776 (PBS) blocking buffer (LI-COR Biosciences; P/N 927-70001), followed by  
777 incubation with the indicated primary antibody (LTBP-3, pAb952) [56]; PPAR $\gamma$   
778 (Cell Signaling Technology; 81B8), or GAPDH (Santa Cruz SC-32233). Secondary  
779 antibody (LI-COR Biotechnologies, Lincoln, NE; 925-68070/925-32211)  
780 incubation with anti-rabbit (LI-COR, IRDye 800CW Goat anti-Rb IgG) or anti-  
781 mouse secondary antibodies (LI-COR, IRDye 680RD Goat anti-Mouse IgG).  
782 Imaging was conducted on an Image Studio™ 5.2x Odyssey CLx, (LI-COR  
783 Lincoln, Nebraska USA). Image analysis of protein bands was determined using  
784 Image Studio™ 5.2x Odyssey CLx.

785

#### 786 **Immunofluorescence**

787 Cells were fixed with 2% PFA for 5 min at room temperature, washed 3 times with  
788 1X PBS, permeabilized in 0.2% Triton X-100 for 5 min, and incubated with 5%  
789 serum from the species used to generate the secondary antibody. Cells were  
790 subsequently incubated with primary antibody overnight at 4°C, washed 3X with  
791 1X PBS, and incubated with secondary antibody for 1 h at room temperature  
792 followed by 3 washes with 1X PBS. Primary and secondary antibodies dilutions  
793 were prepared in 1X PBST. DAPI staining (0.66  $\mu\text{g}/\mu\text{L}$ ) was performed for 5 min  
794 at room temperature followed by washing in PBST. Slides were mounted using  
795 antifade reagent (Invitrogen ProLong Gold Antifade Mountant; P10144) for 3 days  
796 at room temperature and sealed with colorless nail polish. The slides were kept at -  
797 20°C until photographed with a Nikon microscope (Nikon ECLIPSE TS100) image  
798 software NIS-Elements D5.30.05 64 bit). Scale bar, 100  $\mu\text{m}$ .

799

#### 800 **Lipid accumulation assay**

801 Lipid accumulation in adipocytes was detected by ORO staining (Millipore Sigma,  
802 St. Louis, MO; O0625-25G) as described [64].

803

804

## 805 **Luciferase assay**

806 The active TGF $\beta$  in *Ltbp3* KD cells was determined using luciferase reporter cells  
807 [65]. To measure active TGF $\beta$ , 10T1/2 cells were treated with siCtrl or siLtbp3-2  
808 for 48 h, at which time reporter cells were co-cultured at a ratio of  $1.5 \times 10^4$  siLtbp3-  
809 2 or siCtrl cells to  $2 \times 10^3$ / reporter cells per well in a 96 well plate for 8 h, followed  
810 by addition of the pan-TGF $\beta$  neutralizing antibody 1D11 (80 ng/mL), an isotype-  
811 matched murine IgG (13C4; 80 ng/mL), TGF $\beta$  type I receptor kinase inhibitor  
812 (SB431542; 2  $\mu$ M), or DMSO for 16 h in regular or adipogenic media. The  
813 luciferase assay was performed as described [65].

814

## 815 **Rescue assay**

816 Four h post-seeding, cells were transduced with either LentiCtrl or LentiLTBP3  
817 virus particles. Day 1 post-transduction, cells were trypsinized, replated, and grown  
818 for 3 more days. On day 6 post-infection, cells were reseeded in 6 well cluster plates  
819 at a density of  $3 \times 10^3$  cells/cm<sup>2</sup>. Four h post-seeding, LentiCtrl or LentiLTBP3  
820 cells were treated overnight with 20 pmol siCtrl or siLtbp3-2. After overnight  
821 incubation, medium was changed to fresh media for a further 24 h siRNA  
822 incubation. Cells were divided into groups - 0 h, when cells were immediately  
823 processed for RNA isolation, and 72 h, when cells were processed for measurement  
824 of mRNA levels using qRT-PCR. To measure protein levels, experimental  
825 conditions were the same as above. Cells were processed for protein extraction as  
826 described. To measure mature adipocyte numbers, cells were fixed in 4% PFA on  
827 day 5 post adipogenic induction and percentage of cells with lipid vesicles was  
828 computed as defined above.

829

## 830 **Statistical analysis**

831 Data are reported as means  $\pm$  SEM in bar graphs. \* $p < 0.05$ , \*\* $p < 0.01$ , \*\*\* $p <$   
832  $0.001$ . For *in vivo* studies, minimum 5-10 animals per group and age-matched  
833 animals were used. Cell culture experiments were reproduced 2-3 times using cells  
834 at different passage numbers. Statistical significance of data was evaluated based  
835 on the experimental conditions and comparisons as defined in the figure legend and

836 using one of the following statistical tests; one-way analysis of variance (ANOVA),  
837 two-way mixed model analysis of variance ANOVA with Tukey's multiple  
838 comparisons test, Kruskal-Wallis test with Dunn's multiple comparisons tests, or  
839 Mann-Whitney U test. Data were analyzed employing GraphPad Prism 9 and JMP  
840 PRO 16.

841

#### 842 **Funding**

843 This work was supported by grant 5 P01HL134605-03 from the National Heart,  
844 Lung, and Blood Institute to DR.

845

#### 846 **Author contributions**

847 KS, NS, TE and BD performed the experiments. KS and DR wrote the manuscript.  
848 KS and DR conceptualized, designed, visualized, and analyzed the data. DR  
849 supervised the study. All authors have read the manuscript.

850

#### 851 **Acknowledgments**

852 We thank Megha Kothari, Princi Labana, and Avinash Singh for assisting in  
853 counting cells for the adipogenic differentiation assay.

854

#### 855 **Conflict of interest**

856 All of the authors declare no conflict of interest.

857

#### 858 **Availability of data**

859 All data will be available from the DRYAD database once the manuscript is  
860 accepted.

861

862

#### 863 **References**

864[1] S.J. Engle, J.B. Hoying, G.P. Boivin, I. Ormsby, P.S. Gartside, T. Doetschman,  
865 Transforming growth factor beta1 suppresses nonmetastatic colon cancer at an  
866 early stage of tumorigenesis, *Cancer Res.* 59 (1999) 3379–3386.

- 867[2] Z. Yang, Z. Mu, B. Dabovic, V. Jurukovski, D. Yu, J. Sung, X. Xiong, J.S.  
868 Munger, Absence of integrin-mediated TGFbeta1 activation in vivo recapitulates  
869 the phenotype of TGFbeta1-null mice, *J. Cell Biol.* 176 (2007) 787–793.
- 870[3] K. Yoshinaga, H. Obata, V. Jurukovski, R. Mazzieri, Y. Chen, L. Zilberberg, D.  
871 Huso, J. Melamed, P. Prijatelj, V. Todorovic, B. Dabovic, D.B. Rifkin,  
872 Perturbation of transforming growth factor (TGF)-beta1 association with latent  
873 TGF-beta binding protein yields inflammation and tumors, *Proc. Natl. Acad. Sci.*  
874 *U. S. A.* 105 (2008) 18758–18763.
- 875[4] M. Morikawa, R. Derynck, K. Miyazono, TGF- $\beta$  and the TGF- $\beta$  Family: Context-  
876 Dependent Roles in Cell and Tissue Physiology, *Cold Spring Harb. Perspect. Biol.*  
877 8 (2016). <https://doi.org/10.1101/cshperspect.a021873>.
- 878[5] D.B. Constam, Regulation of TGF $\beta$  and related signals by precursor processing,  
879 *Semin. Cell Dev. Biol.* 32 (2014) 85–97.
- 880[6] I.B. Robertson, D.B. Rifkin, Regulation of the Bioavailability of TGF- $\beta$  and TGF-  
881  $\beta$ -Related Proteins, *Cold Spring Harb. Perspect. Biol.* 8 (2016).  
882 <https://doi.org/10.1101/cshperspect.a021907>.
- 883[7] S. Liénart, R. Merceron, C. Vanderaa, F. Lambert, D. Colau, J. Stockis, B. van der  
884 Woning, H. De Haard, M. Saunders, P.G. Coulie, S.N. Savvides, S. Lucas,  
885 Structural basis of latent TGF- $\beta$ 1 presentation and activation by GARP on human  
886 regulatory T cells, *Science.* 362 (2018) 952–956.
- 887[8] Y. Qin, B.S. Garrison, W. Ma, R. Wang, A. Jiang, J. Li, M. Mistry, R.T. Bronson,  
888 D. Santoro, C. Franco, D.A. Robinton, B. Stevens, D.J. Rossi, C. Lu, T.A.  
889 Springer, A Milieu Molecule for TGF- $\beta$  Required for Microglia Function in the  
890 Nervous System, *Cell.* 174 (2018) 156–171.e16.  
891 <https://doi.org/10.1016/j.cell.2018.05.027>.
- 892[9] T. Harel, E. Levy-Lahad, M. Daana, H. Mechoulam, S. Horowitz-Cederboim, M.  
893 Gur, V. Meiner, O. Elpeleg, Homozygous stop-gain variant in LRRC32, encoding  
894 a TGF $\beta$  receptor, associated with cleft palate, proliferative retinopathy, and  
895 developmental delay, *Eur. J. Hum. Genet.* 27 (2019) 1315–1319.
- 896[10] D. Rifkin, N. Sachan, K. Singh, E. Sauber, G. Tellides, F. Ramirez, The role of  
897 LTBP1s in TGF beta signaling, *Dev. Dyn.* 251 (2022) 95–104.
- 898[11] J. Saharinen, J. Taipale, J. Keski-Oja, Association of the small latent transforming  
899 growth factor-beta with an eight cysteine repeat of its binding protein LTBP-1,  
900 *EMBO J.* 15 (1996) 245–253.
- 901[12] P.-E. Gleizes, R.C. Beavis, R. Mazzieri, B. Shen, D.B. Rifkin, Identification and  
902 Characterization of an Eight-cysteine Repeat of the Latent Transforming Growth  
903 Factor- $\beta$  Binding Protein-1 that Mediates Bonding to the Latent Transforming  
904 Growth Factor- $\beta$ 1, *Journal of Biological Chemistry.* 271 (1996) 29891–29896.  
905 <https://doi.org/10.1074/jbc.271.47.29891>.
- 906[13] J. Saharinen, J. Keski-Oja, Specific sequence motif of 8-Cys repeats of TGF-beta  
907 binding proteins, LTBP1s, creates a hydrophobic interaction surface for binding of  
908 small latent TGF-beta, *Mol. Biol. Cell.* 11 (2000) 2691–2704.
- 909[14] D.B. Rifkin, Latent transforming growth factor-beta (TGF-beta) binding proteins:  
910 orchestrators of TGF-beta availability, *J. Biol. Chem.* 280 (2005) 7409–7412.
- 911[15] D.E. Clouthier, S.A. Comerford, R.E. Hammer, Hepatic fibrosis,  
912 glomerulosclerosis, and a lipodystrophy-like syndrome in PEPCK-TGF-beta1

- 913 transgenic mice, *Journal of Clinical Investigation*. 100 (1997) 2697–2713.  
914 <https://doi.org/10.1172/jci119815>.
- 915[16] L. Choy, J. Skillington, R. Derynck, Roles of autocrine TGF-beta receptor and  
916 Smad signaling in adipocyte differentiation, *J. Cell Biol.* 149 (2000) 667–682.
- 917[17] L. Choy, R. Derynck, Transforming growth factor-beta inhibits adipocyte  
918 differentiation by Smad3 interacting with CCAAT/enhancer-binding protein  
919 (C/EBP) and repressing C/EBP transactivation function, *J. Biol. Chem.* 278 (2003)  
920 9609–9619.
- 921[18] B. Dabovic, Y. Chen, C. Colarossi, H. Obata, L. Zambuto, M.A. Perle, D.B.  
922 Rifkin, Bone abnormalities in latent TGF- $\beta$  binding protein (Ltbp)-3–null mice  
923 indicate a role for Ltbp-3 in modulating TGF- $\beta$  bioavailability, *Journal of Cell*  
924 *Biology*. 156 (2002) 227–232. <https://doi.org/10.1083/jcb.200111080>.
- 925[19] K. Koli, M. Hyytiäinen, M.J. Ryyänen, J. Keski-Oja, Sequential deposition of  
926 latent TGF-beta binding proteins (LTBPs) during formation of the extracellular  
927 matrix in human lung fibroblasts, *Exp. Cell Res.* 310 (2005) 370–382.
- 928[20] R.A. Ignotz, J. Massagué, Type beta transforming growth factor controls the  
929 adipogenic differentiation of 3T3 fibroblasts, *Proc. Natl. Acad. Sci. U. S. A.* 82  
930 (1985) 8530–8534.
- 931[21] R.L. Sparks, R.E. Scott, Transforming growth factor type  $\beta$  is a specific inhibitor  
932 of 3T3 T mesenchymal stem cell differentiation, *Experimental Cell Research*. 165  
933 (1986) 345–352. [https://doi.org/10.1016/0014-4827\(86\)90588-4](https://doi.org/10.1016/0014-4827(86)90588-4).
- 934[22] F.M. Torti, S.V. Torti, J.W. Larrick, G.M. Ringold, Modulation of adipocyte  
935 differentiation by tumor necrosis factor and transforming growth factor beta, *J.*  
936 *Cell Biol.* 108 (1989) 1105–1113.
- 937[23] E.J. van Zoelen, I. Duarte, J.M. Hendriks, S.P. van der Woning, TGF $\beta$ -induced  
938 switch from adipogenic to osteogenic differentiation of human mesenchymal stem  
939 cells: identification of drug targets for prevention of fat cell differentiation, *Stem*  
940 *Cell Res. Ther.* 7 (2016) 123.
- 941[24] N. Zamani, C.W. Brown, Emerging roles for the transforming growth factor-  
942 {beta} superfamily in regulating adiposity and energy expenditure, *Endocr. Rev.*  
943 32 (2011) 387–403.
- 944[25] S. Smaldone, N.P. Clayton, M. del Solar, G. Pascual, S.H. Cheng, B.M.  
945 Wentworth, M.B. Schaffler, F. Ramirez, Fibrillin-1 Regulates Skeletal Stem Cell  
946 Differentiation by Modulating TGF $\beta$  Activity Within the Marrow Niche, *J. Bone*  
947 *Miner. Res.* 31 (2016) 86–97.
- 948[26] R. Serra, M. Johnson, E.H. Filvaroff, J. LaBorde, D.M. Sheehan, R. Derynck, H.L.  
949 Moses, Expression of a truncated, kinase-defective TGF-beta type II receptor in  
950 mouse skeletal tissue promotes terminal chondrocyte differentiation and  
951 osteoarthritis, *J. Cell Biol.* 139 (1997) 541–552.
- 952[27] M.B. Mueller, M. Fischer, J. Zellner, A. Berner, T. Dienstknecht, L. Prantl, R.  
953 Kujat, M. Nerlich, R.S. Tuan, P. Angele, Hypertrophy in mesenchymal stem cell  
954 chondrogenesis: effect of TGF-beta isoforms and chondrogenic conditioning,  
955 *Cells Tissues Organs*. 192 (2010) 158–166.
- 956[28] I. Grafe, S. Alexander, J.R. Peterson, T.N. Snider, B. Levi, B. Lee, Y. Mishina,  
957 TGF- $\beta$  Family Signaling in Mesenchymal Differentiation, *Cold Spring Harb.*  
958 *Perspect. Biol.* 10 (2018). <https://doi.org/10.1101/cshperspect.a022202>.

- 959[29] M.L. Muthu, K. Tiedemann, J. Fradette, S. Komarova, D.P. Reinhardt, Fibrillin-1  
960 regulates white adipose tissue development, homeostasis, and function, *Matrix*  
961 *Biol.* 110 (2022) 106–128.
- 962[30] L. Zilberberg, C.K. Phoon, I. Robertson, B. Dabovic, F. Ramirez, D.B. Rifkin,  
963 Genetic analysis of the contribution of LTBP-3 to thoracic aneurysm in Marfan  
964 syndrome, *Proc Natl Acad Sci U S A.* 112 (2015) 14012-7. doi:  
965 10.1073/pnas.1507652112. Epub 2015 Oct 22. PMID: 26494287; PMCID:  
966 PMC4653215.
- 967[31] B. Dabovic, Y. Chen, J. Choi, E.C. Davis, L.Y. Sakai, V. Todorovic, M. Vassallo,  
968 L. Zilberberg, A. Singh, D.B. Rifkin, Control of lung development by latent TGF-  
969  $\beta$  binding proteins, *J. Cell. Physiol.* 226 (2011) 1499–1509.[32] K. Koli, M.J.  
970 Ryyänänen, J. Keski-Oja, Latent TGF-beta binding proteins (LTBPs)-1 and -3  
971 coordinate proliferation and osteogenic differentiation of human mesenchymal  
972 stem cells, *Bone.* 43 (2008) 679–688.
- 973[33] A. Gualandris, J.P. Annes, M. Arese, I. Noguera, V. Jurukovski, D.B. Rifkin, The  
974 latent transforming growth factor-beta-binding protein-1 promotes in vitro  
975 differentiation of embryonic stem cells into endothelium, *Mol. Biol. Cell.* 11  
976 (2000) 4295–4308.
- 977[34] Y. Nakajima, K. Miyazono, M. Kato, M. Takase, T. Yamagishi, H. Nakamura,  
978 Extracellular fibrillar structure of latent TGF beta binding protein-1: role in TGF  
979 beta-dependent endothelial-mesenchymal transformation during endocardial  
980 cushion tissue formation in mouse embryonic heart, *J. Cell Biol.* 136 (1997) 193–  
981 204.
- 982[35] R. Flaumenhaft, M. Abe, Y. Sato, K. Miyazono, J. Harpel, C.H. Heldin, D.B.  
983 Rifkin, Role of the latent TGF-beta binding protein in the activation of latent TGF-  
984 beta by co-cultures of endothelial and smooth muscle cells, *J. Cell Biol.* 120 (1993)  
985 995–1002.
- 986[36] M. Huckert, C. Stoetzel, S. Morkmued, V. Laugel-Haushalter, V. Geoffroy, J.  
987 Muller, F. Clauss, M.K. Prasad, F. Obry, J.L. Raymond, M. Switala, Y. Alembik,  
988 S. Soskin, E. Mathieu, J. Hemmerlé, J.-L. Weickert, B.B. Dabovic, D.B. Rifkin,  
989 A. Dheedene, E. Boudin, O. Caluseriu, M.-C. Cholette, R. Mcleod, R. Antequera,  
990 M.-P. Gellé, J.-L. Coeuriot, L.-F. Jacquelin, I. Bailleul-Forestier, M.-C. Manière,  
991 W. Van Hul, D. Bertola, P. Dollé, A. Verloes, G. Mortier, H. Dollfus, A. Bloch-  
992 Zupan, Mutations in the latent TGF-beta binding protein 3 (LTBP3) gene cause  
993 brachyolmia with amelogenesis imperfecta, *Hum. Mol. Genet.* 24 (2015) 3038–  
994 3049.
- 995[37] M. Horiguchi, V. Todorovic, K. Hadjiolova, R. Weiskirchen, D.B. Rifkin,  
996 Abrogation of both short and long forms of latent transforming growth factor- $\beta$   
997 binding protein-1 causes defective cardiovascular development and is perinatally  
998 lethal, *Matrix Biology.* 43 (2015) 61–70.  
999 <https://doi.org/10.1016/j.matbio.2015.03.006>.
- 1000[38] J.S. Munger, X. Huang, H. Kawakatsu, M.J. Griffiths, S.L. Dalton, J. Wu, J.F.  
1001 Pittet, N. Kaminski, C. Garat, M.A. Matthay, D.B. Rifkin, D. Sheppard, The  
1002 integrin alpha v beta 6 binds and activates latent TGF beta 1: a mechanism for  
1003 regulating pulmonary inflammation and fibrosis, *Cell.* 96 (1999) 319–328.

- 1004[39] J.P. Annes, Y. Chen, J.S. Munger, D.B. Rifkin, Integrin  $\alpha$ V $\beta$ 6-mediated activation  
1005 of latent TGF- $\beta$  requires the latent TGF- $\beta$  binding protein-1, *Journal of Cell*  
1006 *Biology*. 165 (2004) 723–734. <https://doi.org/10.1083/jcb.200312172>.
- 1007[40] R. Wang, J. Zhu, X. Dong, M. Shi, C. Lu, T.A. Springer, GARP regulates the  
1008 bioavailability and activation of TGF $\beta$ , *Mol. Biol. Cell*. 23 (2012) 1129–1139.
- 1009[41] M. Shi, J. Zhu, R. Wang, X. Chen, L. Mi, T. Walz, T.A. Springer, Latent TGF- $\beta$   
1010 structure and activation, *Nature*. 474 (2011) 343–349.
- 1011[42] X. Dong, B. Zhao, R.E. Iacob, J. Zhu, A.C. Koksal, C. Lu, J.R. Engen, T.A.  
1012 Springer, Force interacts with macromolecular structure in activation of TGF- $\beta$ ,  
1013 *Nature*. 542 (2017) 55–59.
- 1014[43] D. Halbgebauer, J. Roos, J.B. Funcke, H. Neubauer, B.S. Hamilton, E. Simon,  
1015 E.Z. Amri, K.M. Debatin, M. Wabitsch, P. Fischer-Posovszky, D. Tews, Latent  
1016 TGF $\beta$ -binding proteins regulate UCP1 expression and function via TGF $\beta$ 2, *Mol*  
1017 *Metab*. 53 (2021) 101336.
- 1018[44] E.R. Neptune, P.A. Frischmeyer, D.E. Arking, L. Myers, T.E. Bunton, B. Gayraud,  
1019 F. Ramirez, L.Y. Sakai, H.C. Dietz, Dysregulation of TGF-beta activation  
1020 contributes to pathogenesis in Marfan syndrome, *Nat. Genet*. 33 (2003) 407–411.
- 1021[45] Z. Isogai, R.N. Ono, S. Ushiro, D.R. Keene, Y. Chen, R. Mazzieri, N.L.  
1022 Charbonneau, D.P. Reinhardt, D.B. Rifkin, L.Y. Sakai, Latent transforming  
1023 growth factor beta-binding protein 1 interacts with fibrillin and is a microfibril-  
1024 associated protein, *J. Biol. Chem*. 278 (2003) 2750–2757.
- 1025[46] T. Massam-Wu, M. Chiu, R. Choudhury, S.S. Chaudhry, A.K. Baldwin, A.  
1026 McGovern, C. Baldock, C.A. Shuttleworth, C.M. Kielty, Assembly of fibrillin  
1027 microfibrils governs extracellular deposition of latent TGF beta, *J. Cell Sci*. 123  
1028 (2010) 3006–3018.
- 1029[47] H. Nistala, S. Lee-Arteaga, S. Smaldone, G. Siciliano, F. Ramirez, Extracellular  
1030 microfibrils control osteoblast-supported osteoclastogenesis by restricting  
1031 TGF{beta} stimulation of RANKL production, *J. Biol. Chem*. 285 (2010) 34126–  
1032 34133.
- 1033[48] Q. Hu, A. Shifren, C. Sens, J. Choi, Z. Szabo, B.C. Starcher, R.H. Knutsen, J.M.  
1034 Shipley, E.C. Davis, R.P. Mecham, Z. Urban, Mechanisms of emphysema in  
1035 autosomal dominant cutis laxa, *Matrix Biol*. 29 (2010) 621–628.
- 1036[49] B. Callewaert, M. Renard, V. Huchtagowder, B. Albrecht, I. Hausser, E. Blair, C.  
1037 Dias, A. Albino, H. Wachi, F. Sato, R.P. Mecham, B. Loeys, P.J. Coucke, A. De  
1038 Paepe, Z. Urban, New insights into the pathogenesis of autosomal-dominant cutis  
1039 laxa with report of five ELN mutations, *Hum. Mutat*. 32 (2011) 445–455.
- 1040[50] C. Le Goff, F. Morice-Picard, N. Dagonneau, L.W. Wang, C. Perrot, Y.J. Crow, F.  
1041 Bauer, E. Flori, C. Prost-Squarcioni, D. Krakow, G. Ge, D.S. Greenspan, D.  
1042 Bonnet, M. Le Merrer, A. Munnich, S.S. Apte, V. Cormier-Daire, ADAMTSL2  
1043 mutations in geleophysic dysplasia demonstrate a role for ADAMTS-like proteins  
1044 in TGF-beta bioavailability regulation, *Nat. Genet*. 40 (2008) 1119–1123.
- 1045[51] C.S. Craft, T.A. Pietka, T. Schappe, T. Coleman, M.D. Combs, S. Klein, N.A.  
1046 Abumrad, R.P. Mecham, The extracellular matrix protein MAGP1 supports  
1047 thermogenesis and protects against obesity and diabetes through regulation of  
1048 TGF- $\beta$ , *Diabetes*. 63 (2014) 1920–1932.



- 1049[52] C.S. Craft, T.J. Broekelmann, W. Zou, J.C. Chappel, S.L. Teitelbaum, R.P.  
1050 Mecham, Oophorectomy-induced bone loss is attenuated in MAGP1-deficient  
1051 mice, *J. Cell. Biochem.* 113 (2012) 93–99.
- 1052[53] Z. Urban, V. Huchtagowder, N. Schürmann, V. Todorovic, L. Zilberberg, J. Choi,  
1053 C. Sens, C.W. Brown, R.D. Clark, K.E. Holland, M. Marble, L.Y. Sakai, B.  
1054 Dabovic, D.B. Rifkin, E.C. Davis, Mutations in LTBP4 Cause a Syndrome of  
1055 Impaired Pulmonary, Gastrointestinal, Genitourinary, Musculoskeletal, and  
1056 Dermal Development, *The American Journal of Human Genetics.* 85 (2009) 593–  
1057 605. <https://doi.org/10.1016/j.ajhg.2009.09.013>.
- 1058[54] K. Hanada, M. Vermeij, G.A. Garinis, M.C. de Waard, M.G.S. Kunen, L. Myers,  
1059 A. Maas, D.J. Duncker, C. Meijers, H.C. Dietz, R. Kanaar, J. Essers, Perturbations  
1060 of vascular homeostasis and aortic valve abnormalities in fibulin-4 deficient mice,  
1061 *Circ. Res.* 100 (2007) 738–746.
- 1062[55] M. Renard, T. Holm, R. Veith, B.L. Callewaert, L.C. Adès, O. Baspinar, A.  
1063 Pickart, M. Dasouki, J. Hoyer, A. Rauch, P. Trapane, M.G. Earing, P.J. Coucke,  
1064 L.Y. Sakai, H.C. Dietz, A.M. De Paepe, B.L. Loeys, Altered TGF $\beta$  signaling and  
1065 cardiovascular manifestations in patients with autosomal recessive cutis laxa type  
1066 I caused by fibulin-4 deficiency, *European Journal of Human Genetics.* 18 (2010)  
1067 895–901. <https://doi.org/10.1038/ejhg.2010.45>.
- 1068[56] A. Hildebrand, M. Romarís, L.M. Rasmussen, D. Heinegård, D.R. Twardzik,  
1069 W.A. Border, E. Ruoslahti, Interaction of the small interstitial proteoglycans  
1070 biglycan, decorin and fibromodulin with transforming growth factor beta,  
1071 *Biochem. J.* 302 ( Pt 2) (1994) 527–534.
- 1072[57] C. Cabello-Verrugio, E. Brandan, A novel modulatory mechanism of transforming  
1073 growth factor-beta signaling through decorin and LRP-1, *J. Biol. Chem.* 282  
1074 (2007) 18842–18850.
- 1075[58] H. Kizawa, I. Kou, A. Iida, A. Sudo, Y. Miyamoto, A. Fukuda, A. Mabuchi, A.  
1076 Kotani, A. Kawakami, S. Yamamoto, A. Uchida, K. Nakamura, K. Notoya, Y.  
1077 Nakamura, S. Ikegawa, An aspartic acid repeat polymorphism in asporin inhibits  
1078 chondrogenesis and increases susceptibility to osteoarthritis, *Nat. Genet.* 37 (2005)  
1079 138–144.
- 1080[59] M. Abrial, S. Basu, M. Huang, V. Butty, A. Schwertner, S. Jeffrey, D. Jordan, C.E.  
1081 Burns, C.G. Burns, Latent TGF $\beta$ -binding proteins 1 and 3 protect the larval  
1082 zebrafish outflow tract from aneurysmal dilatation, *Dis. Model. Mech.* 15 (2022).  
1083 <https://doi.org/10.1242/dmm.046979>.
- 1084[60] L. Pottie, C.S. Adamo, A. Beyens, S. Lütke, P. Tapaneeeyaphan, A. De Clercq, P.L.  
1085 Salmon, R. De Rycke, A. Gezdirici, E.Y. Gulec, N. Khan, J.E. Urquhart, W.G.  
1086 Newman, K. Metcalfe, S. Efthymiou, R. Maroofian, N. Anwar, S. Maqbool, F.  
1087 Rahman, I. Altweijri, M. Alsaleh, S.M. Abdullah, M. Al-Owain, M. Hashem, H.  
1088 Houlden, F.S. Alkuraya, P. Sips, G. Sengle, B. Callewaert, Bi-allelic premature  
1089 truncating variants in LTBP1 cause cutis laxa syndrome, *Am. J. Hum. Genet.* 108  
1090 (2021) 1095–1114.
- 1091[61] M. Horiguchi, M. Ota, D.B. Rifkin, Matrix control of transforming growth factor-  
1092  $\beta$  function, *J. Biochem.* 152 (2012) 321–329.
- 1093[62] E.M.S. Litwinoff, M.Y. Gold, K. Singh, J. Hu, H. Li, K. Cadwell, A.M. Schmidt,  
1094 Myeloid ATG16L1 does not affect adipose tissue inflammation or body mass in

- 1095 mice fed high fat diet, *Obesity Research & Clinical Practice*. 12 (2018) 174–186.  
1096 <https://doi.org/10.1016/j.orcp.2017.10.006>.
- 1097[63] K. Singh, N.G. Prasad, Cold stress upregulates the expression of heat shock  
1098 proteins and Frost genes, but evolution of cold stress resistance is apparently not  
1099 mediated through either heat shock proteins or Frost genes in the cold stress  
1100 selected population. *bioRxiv*. (2022). <https://doi.org/10.1101/2022.03.07.483305>
- 1101[64] J.L. Ramírez-Zacarías, F. Castro-Muñozledo, W. Kuri-Harcuch, Quantitation of  
1102 adipose conversion and triglycerides by staining intracytoplasmic lipids with Oil  
1103 red O, *Histochemistry*. 97 (1992) 493–497.
- 1104[65] M. Abe, J.G. Harpel, C.N. Metz, I. Nunes, D.J. Loskutoff, D.B. Rifkin. An assay  
1105 for transforming growth factor-beta using cells transfected with a plasminogen  
1106 activator inhibitor-1 promoter-luciferase construct. *Anal Biochem*. 216 (1994)  
1107 276-84. <https://doi.org/10.1006/abio.1994.1042>

1108

1109

1110

1111

1112

1113

# 1 Latent Transforming Growth Factor $\beta$ Binding Protein 3 Controls Adipogenesis

2

3 *Karan Singh, Nalani Sachan, Taylor Ene, Branka Dabovic, Daniel Rifkin*

## 4 *Supplementary material*

5

6

7

8

9

10

11

12

13

14

15

16

17

18

19

20

21

22

23

24

25

26

27

28

29

30

31

32

33

34

35

36

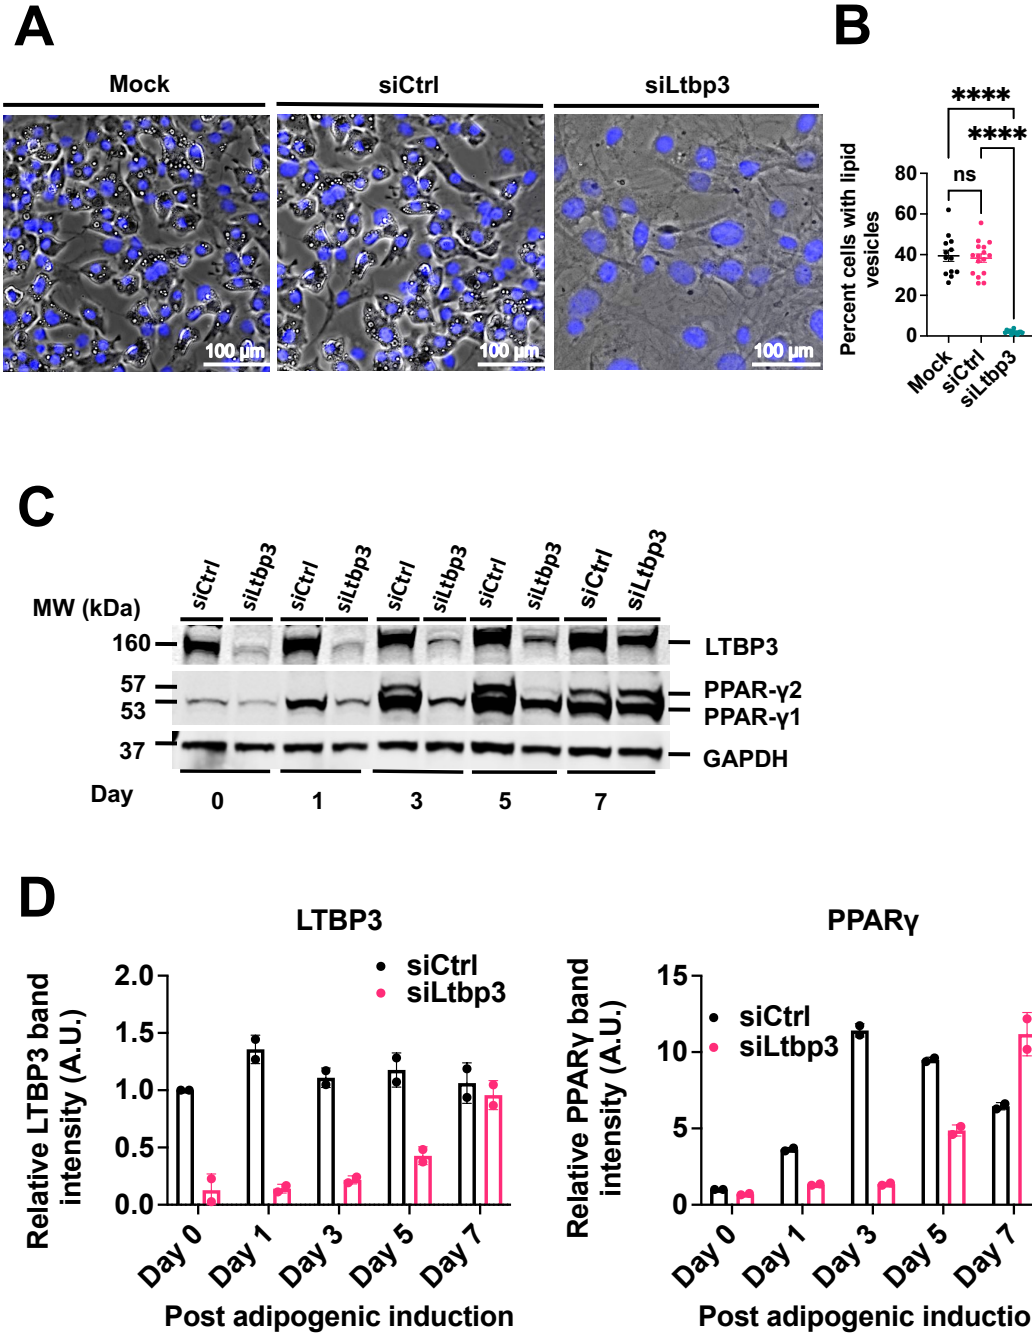

37 **Supplementary Figure 1. LTBP3 loss inhibits adipogenesis.** (A) Lipid droplet accumulation  
38 after *Ltbp3* KD. Images represent siCtrl or siLtbp3-4 treated 10T1/2 cells on day 5 after adipogenic  
39 stimulation illustrating lipid droplets (white vesicles) and DAPI stained nuclei (blue). The images  
40 are representative of 3 experiments. (B) Quantification of lipid loaded cells from panel A. The  
41 number of cells with lipid droplets, as well as total number of cells, were counted manually. A  
42 total of 13-15 random fields from each treatment group were counted. (C) Immunoblotting for  
43 LTBP3, PPAR $\gamma$ , and GAPDH in 10T1/2 cells treated with siCtrl versus siLtbp3-4 for 2 days  
44 followed by adipogenic differentiation for 0, 1, 3, 5 and 7 days. The gel is representative of two  
45 independent experiments with 1 technical replica per treatment condition. (D) Quantification of  
46 immunoblots panel C for LTBP3 and PPAR $\gamma$  normalized with to GAPDH. Statistical significance  
47 of **Fig. B** was evaluated by nonparametric, Kruskal-Wallis test with Dunn's multiple comparisons  
48 test. Data are represented as means  $\pm$  SEM. \*\*\*\*p < 0.0001.

49  
50  
51  
52  
53  
54  
55  
56  
57  
58  
59  
60  
61  
62  
63  
64  
65  
66  
67

68  
69  
70  
71  
72  
73  
74  
75  
76  
77  
78  
79  
80  
81  
82  
83  
84  
85  
86  
87  
88  
89  
90  
91  
92  
93  
94  
95  
96  
97  
98

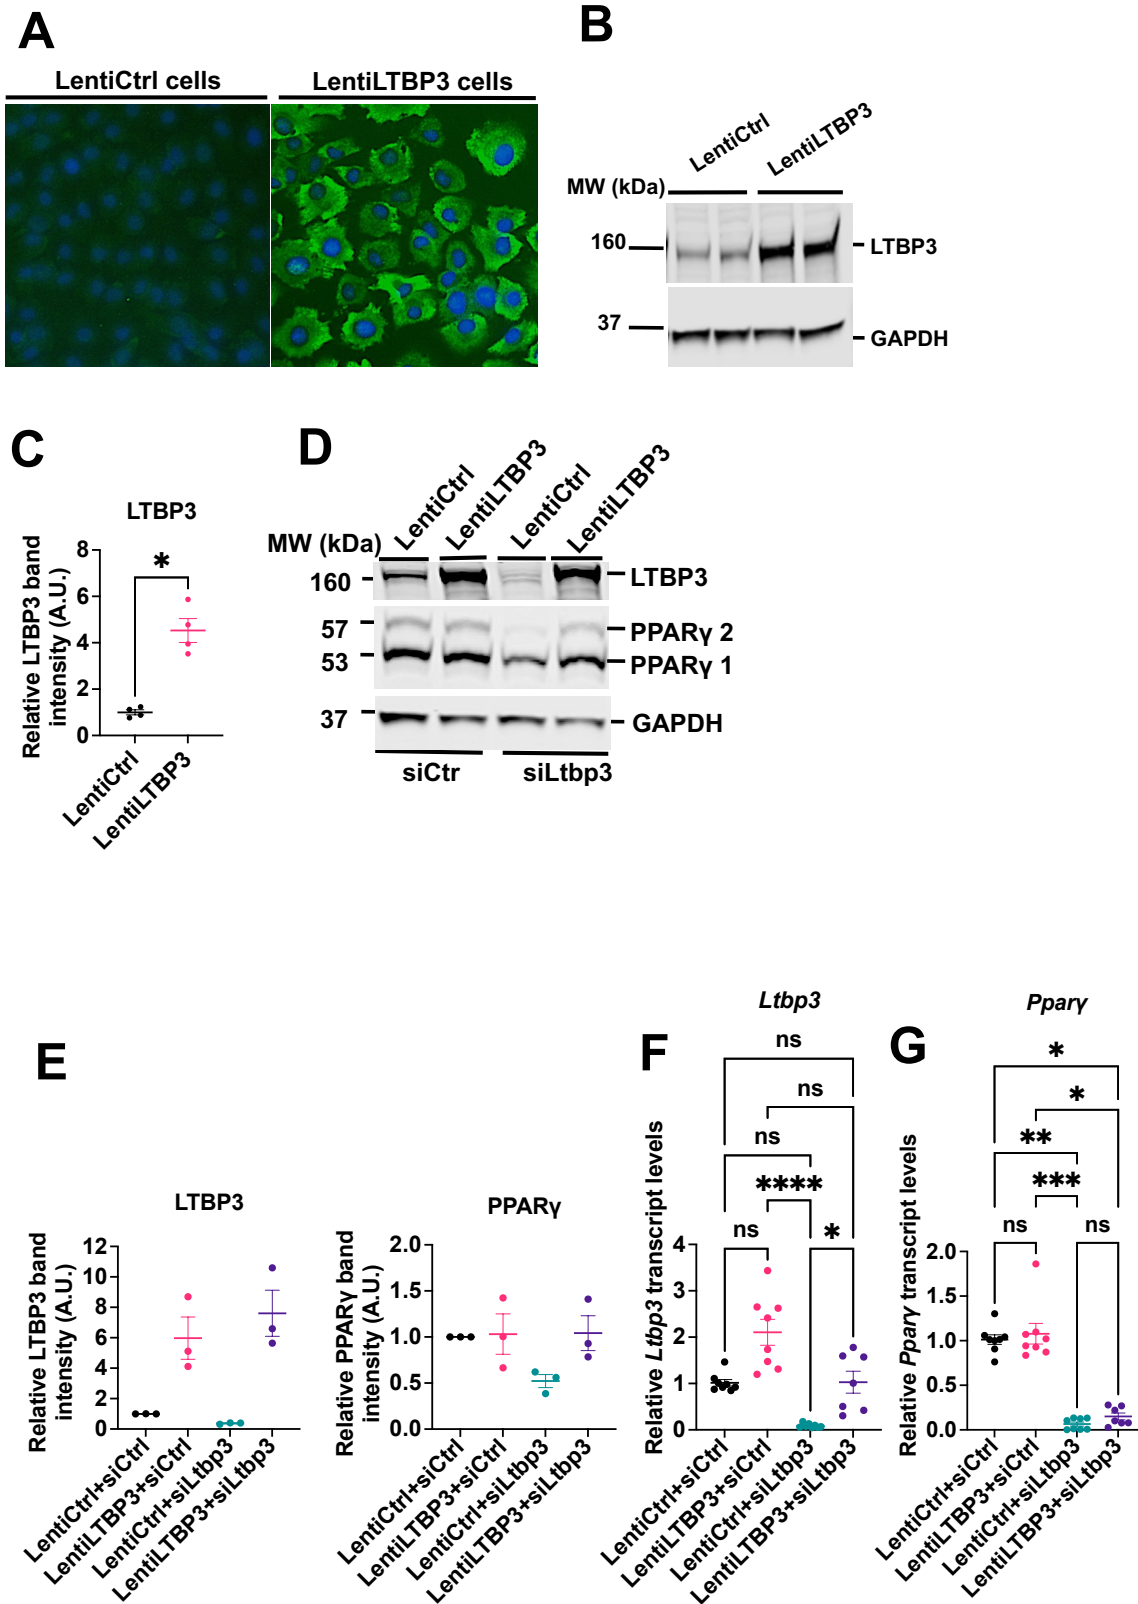

99 **Supplementary Figure 2. Rescue of adipogenesis by *Ltbp3* expression.** (A) LTBP3  
100 immunofluorescence staining. Immunostaining was performed on day 6 post exposure of 10T1/2  
101 cells transduced with lentiviral particles expressing *Ltbp3* or control vector. Cells were fixed with  
102 2% PFA and stained with an antibody (green) against LTBP3. Nuclei were stained with DAPI  
103 (blue). Scale bars, 100  $\mu$ m. Figures are representative of one of 3 independent experiments. (B)  
104 Immunoblotting of LTBP3 from cell lysates after lentiviral transduction of rescue *Ltbp3* in 10T1/2  
105 cells. The immunoblot shows the levels of LTBP3 and GAPDH in 10T1/2 transduced cells after 6  
106 days. The immunoblot is representative of one of two independent experiments and there were two  
107 technical replicas (samples from transduction in two different wells in 6-well plate) for each group.  
108 (C) Quantification of immunoblots of LTBP3 normalized with GAPDH for panel B. There were  
109 2 independent experiments in each group. (D) Immunoblots of lysates from LentiCtrl and  
110 LentiLTBP3 cells treated with siCtrl or siLtbp3-2. After 72 h of adipogenic induction, cell lysates  
111 were analyzed by immunoblotting with antibodies to LTBP3, PPAR $\gamma$ , and GAPDH. The  
112 immunoblot is representative of one of three independent experiments. (E) Quantification of  
113 immunoblots of LTBP3 and PPAR $\gamma$  that were normalized with GAPDH for panel D. The data  
114 represent the average of 3 independent experiments per treatment group and there was one  
115 technical replica for each group. (F and G) Relative mRNA levels of *Ltbp3*, and *Ppar $\gamma$*  in 10T1/2  
116 cells infected with a lentivirus expressing *WT Ltbp3* and treated with siLtbp3-4 followed by 3 days  
117 of adipogenic differentiation. qRT-PCR values were normalized to *B2m* and plotted relative to  
118 siCtrl. The figures represent the average of 2 independent experiments per treatment group and  
119 there were 3-4 technical replicas for per group. Each technical replica was analyzed twice with  
120 qRT-PCR. Statistical significance of **Fig. 2C** was evaluated with Mann-Whitney U test, and of  
121 **Fig. 2F** and **G** was evaluated using nonparametric, Kruskal-Wallis test with Dunn's multiple  
122 comparisons test. Data are represented as means  $\pm$  SEM. \* $p < 0.05$ , \*\* $p < 0.01$ , \*\*\* $p < 0.001$ ,  
123 \*\*\*\* $p < 0.0001$ .

124  
125  
126  
127  
128  
129

130  
131  
132  
133  
134  
135  
136  
137  
138  
139  
140  
141  
142  
143  
144  
145  
146  
147  
148  
149  
150  
151  
152  
153  
154  
155  
156  
157  
158  
159  
160

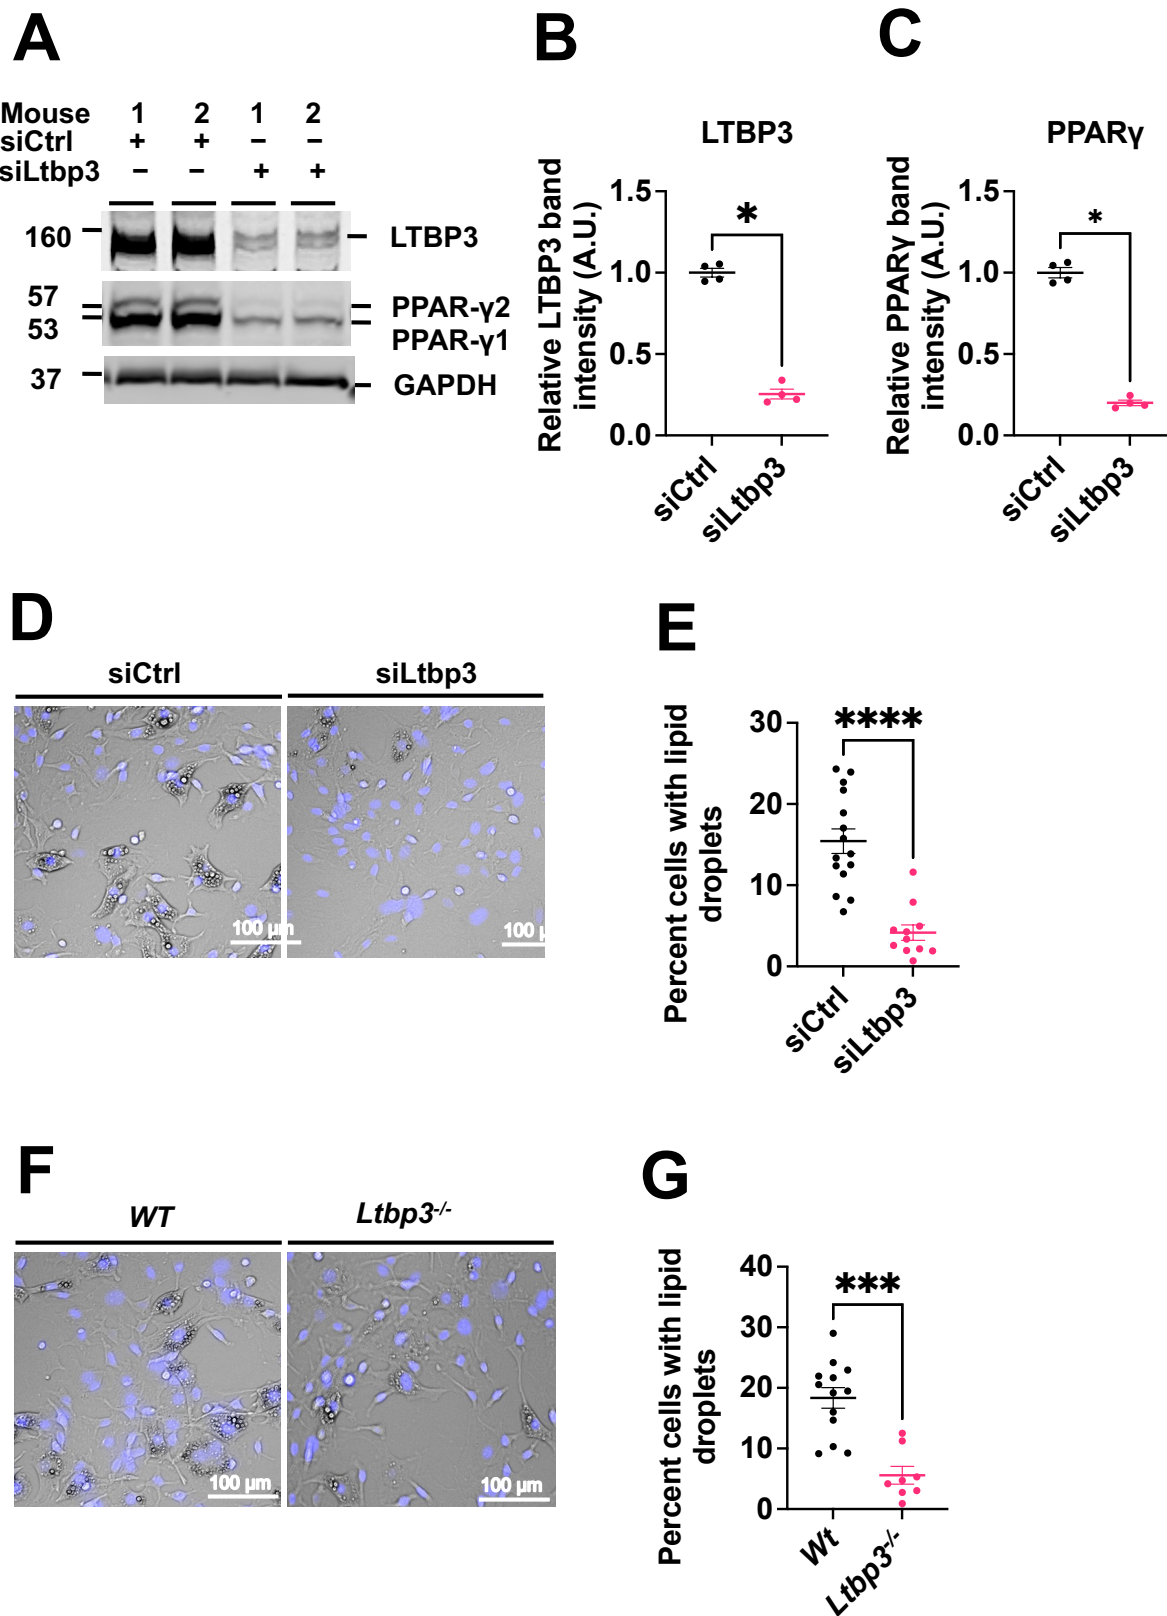

161 **Supplementary Figure 3. LTBP3 loss in BMSC inhibits adipogenesis.** (A) Immunoblot  
162 illustrating the levels of LTBP3, PPAR $\gamma$ , and GAPDH in BMSC treated with siCtrl or siLtbp3-2  
163 for two days followed by 3 days of adipogenic differentiation media treatment. The experiment  
164 was repeated twice with two samples in each group. (B and C) Quantification of LTBP3 and  
165 PPAR $\gamma$  from figure A. Results are representative of two independent experiments. (D)  
166 Representative photographs illustrating the lipid vesicles or droplets (white) and DAPI stained  
167 nuclei (blue) in BMSC treated with siCtrl or siLtbp3-2 followed by 5 days exposure to adipogenic  
168 differentiation media. Data were taken from one of two independent experiments. There were two  
169 samples for each treatment and there were 4 animals in each group. 3-4 random fields were  
170 photographed for each condition. Scale bar, 100  $\mu$ m. (E) Quantification of lipid loaded cells from  
171 panel D. The number of cells with lipid droplets, as well as total number of cells, were determined  
172 manually. 12-16 random fields for each group were scored. (F) Representative photographs  
173 illustrating the lipid vesicles or droplets (white) and DAPI stained nuclei (blue) in BMSC from *Wt*  
174 and *Ltbp3*<sup>-/-</sup> mice treated with adipogenic differentiation media for 5 days. Data were taken from  
175 one of two independent experiments. There were two samples for each group. 3-4 random fields  
176 were photographed for each group. Scale bar, 100  $\mu$ m. (G) Quantification of lipid loaded cells  
177 from panel F. The number of cells with lipid vesicles, as well as total number of cells, were  
178 computed manually. 8-13 random fields for each group were scored (2,000-4,000 cells for each  
179 group). Statistical significance of **Fig. B, C, E, and G** was confirmed using Mann-Whitney U test.  
180 Data are represented as means  $\pm$  SEM. \*p < 0.05, \*\*p < 0.01, \*\*\*p < 0.001.

181

182

183

184

185

186

187

188

189

190



191  
192  
193  
194  
195  
196  
197  
198  
199  
200  
201  
202  
203  
204  
205  
206  
207  
208  
209  
210  
211  
212  
213  
214  
215  
216  
217  
218  
219  
220

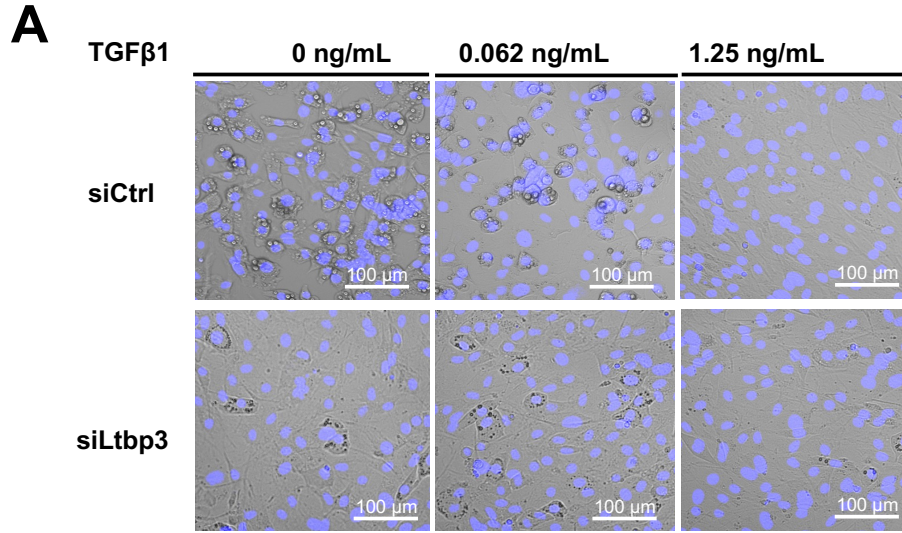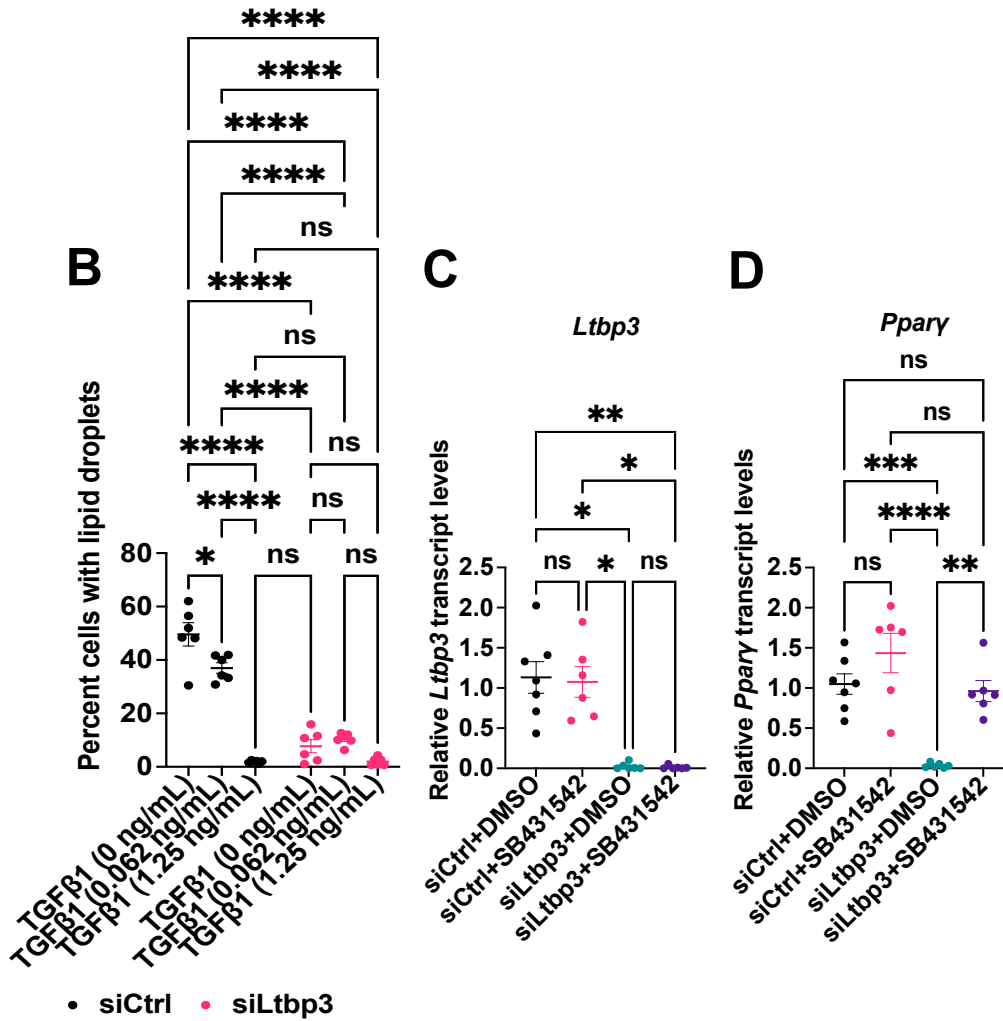

221 **Supplementary Figure 4. TGF $\beta$  treatment inhibits adipogenesis, whereas TGF $\beta$  receptor**  
222 **type I signaling inhibition rescues adipogenesis.** (A) Representative images showing  
223 accumulation of lipid droplets (white vesicles) and DAPI stained nuclei (blue) in 10T1/2 cells  
224 treated with siCtrl or siLtp3-2 for two days and exposed to different dosages of TGF $\beta$ 1 (0, 0.062,  
225 and 1.25 ng/mL) in adipogenic media for 5 days. (B) Quantification of lipid loaded cells from A.  
226 The number of cells with lipid droplets, as well as total number of cells, were counted manually.  
227 6 random fields from each group were scored. Data are representative of two independent  
228 experiments. There were 3 technical replicas for each treatment. Random images from 4-8 fields  
229 were scored for each condition (2,000-4000 cells for each technical replica). (C and D) Relative  
230 mRNA levels of *Ltp3* and *Ppar $\gamma$*  in 10T1/2 cells treated with siCtrl or siLtp3-2 with or without  
231 TGF $\beta$  receptor I kinase inhibitor. The data are from three independent experiments with 2 technical  
232 replicas for each treatment group. Each technical replica was analyzed twice by qRT-PCR.  
233 Statistical significance was evaluated by the two-way mixed model ANOVA with Tukey's  
234 multiple comparisons test (B), one-way ANOVA with Tukey's multiple comparisons test (C) or  
235 by using nonparametric, Kruskal-Wallis test with Dunn's multiple comparisons test (D). Data are  
236 represented as means  $\pm$  SEM.  $p < 0.05$ , \*\* $p < 0.01$ , \*\*\* $p < 0.001$ , \*\*\*\* $p < 0.0001$ .

237

238

239

240

241

242

243

244

245

246

247

248

249

250

251

252  
253  
254  
255  
256  
257  
258  
259  
260  
261  
262  
263  
264  
265  
266  
267  
268  
269  
270  
271  
272  
273  
274  
275  
276  
277  
278  
279  
280  
281

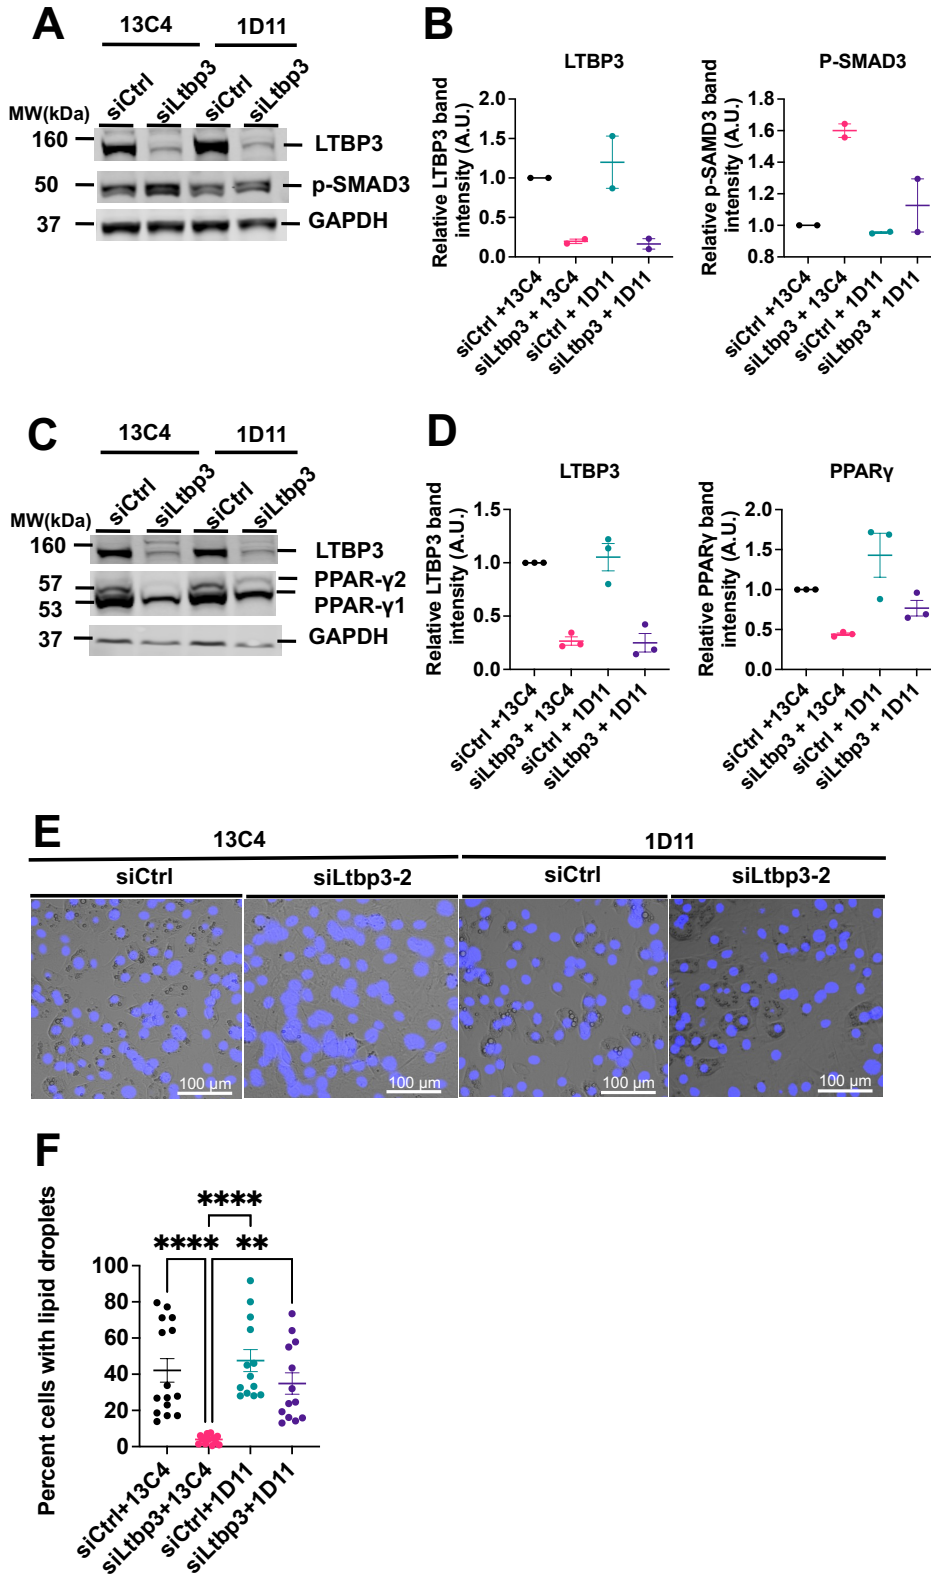

282 **Supplementary Figure 5. Antibody inhibition of TGF $\beta$  rescues adipogenesis in *Ltbp3* KD**  
283 **10T1/2 cells. (A)** Immunoblot illustrating the levels of LTBP3, p-SMAD3 and GAPDH in 10T1/2  
284 cells treated with siCtrl or siLtbp3-2 for two days followed by 3 days of adipogenic differentiation  
285 media treatment with control (13C4) or specific TGF $\beta$  (1D11) neutralizing antibodies. The  
286 experiment was repeated twice. **(B)** Quantification of LTBP3 and p-SMAD3 from figure A. **(C)**  
287 Immunoblot illustrating the levels of LTBP3, PPAR $\gamma$  and GAPDH in 10T1/2 cells treated with  
288 siCtrl or siLtbp3-2 for two days followed by 3 days of adipogenic differentiation media treatment  
289 with control (13C4) or TGF $\beta$  specific (1D11) antibodies. The experiment was repeated three times.  
290 **(D)** Quantification of LTBP3 and PPAR $\gamma$  from figure C. **(E)** Representative images showing  
291 accumulation of lipid droplets (white vesicles) and DAPI stained nuclei (blue) in 10T1/2 cells  
292 treated with siCtrl or siLtbp3-2 for two days and exposed to control (13C4) or TGF $\beta$  specific  
293 (1D11) antibodies in adipogenic media for 5 days. The experiment was repeated three times. **(F)**  
294 Quantification of lipid loaded cells after differentiation was induced in the presence of control  
295 (13C4) or TGF $\beta$  specific (1D11) neutralizing antibodies. The number of cells with lipid droplets,  
296 as well as total number of cells, were counted manually. 4-5 random fields from each treatment  
297 group were counted for each experiment. Data were taken from three independent experiments.  
298 Scale bar, 100  $\mu$ m. Statistical significance of **Fig. F** was evaluated by the using nonparametric,  
299 Kruskal-Wallis test with Dunn's multiple comparisons test. Data are represented as means  $\pm$  SEM.  
300  $p < 0.05$ , \*\* $p < 0.01$ , \*\*\* $p < 0.001$ , \*\*\*\* $p < 0.0001$ .

301  
302  
303  
304  
305  
306  
307  
308  
309  
310  
311  
312

313 **Supplementary Tables:**

314

315

316

317 **Supplementary Table 1. Nucleotide sequences of mouse *Ltbp3*-specific siRNAs used in the**  
318 **study.**

319

| <b>Product name</b> | <b>Company</b> | <b>Catalog no.</b> | <b>Target sequences (all sequences are provided in 5' to 3' orientation)</b> |
|---------------------|----------------|--------------------|------------------------------------------------------------------------------|
| Mm_Ltbp3-1          | QIAGEN         | SI01296995         | CAGCATGTGAAATAGAATTTA                                                        |
| Mm_Ltbp3-2          | QIAGEN         | SI01297002         | CAAATTGTATTACATCCAA                                                          |
| Mm_Ltbp3-3          | QIAGEN         | SI01297009         | CCCAAGGGTGATTCCTAGAAA                                                        |
| Mm_Ltbp3-4          | QIAGEN         | SI04401551         | CCGCTCGTGC GTGGACCTGAA                                                       |

320

321

322

323

324

325

326

327

328

329

330

331

332

333

334

335

336

337 **Supplementary Table 2. Taqman primers used in the study.**

338

| <b>S. no.</b> | <b>Company name</b> | <b>Assay ID/Catalog</b> | <b>Gene</b>   | <b>Dye-label</b> |
|---------------|---------------------|-------------------------|---------------|------------------|
| 1             | Life Technologies   | Mm00498234_m1           | <i>Ltbp1</i>  | FAM-MGB          |
| 2             | Life Technologies   | Mm01307379_m1           | <i>Ltbp2</i>  | FAM-MGB          |
| 3             | Life Technologies   | Mm00521855_m1           | <i>Ltbp3</i>  | FAM-MGB          |
| 4             | Life Technologies   | Mm00723631_m1           | <i>Ltbp4</i>  | FAM-MGB          |
| 5             | Life Technologies   | Mm00550339_g1           | <i>Srebf1</i> | FAM-MGB          |
| 6             | Life Technologies   | Mm00514283_s1           | <i>Cebpa</i>  | FAM-MGB          |
| 7             | Life Technologies   | Mm00843434_s1           | <i>cebpb</i>  | FAM-MGB          |
| 8             | Life Technologies   | mm00786711_s1           | <i>Cebpd</i>  | FAM-MGB          |
| 9             | Life Technologies   | Mm00440940_m1           | <i>Pparg</i>  | FAM-MGB          |
| 10            | Life Technologies   | Mm00437762_m1           | <i>B2m</i>    | VIC-MGB          |
| 11            | Life Technologies   | Mm00662319_m1           | <i>Fasn</i>   | FAM-MGB          |

339

340

341
